# Supplementary material
Source: publisher site journal article supplement (https://www.spandidos-publications.com/4872/downloadSupplementary)
Supplement: Supplementary file 1 [file downloadSupplementary]

## Sheet: S3
Table SIII. NSUN5-correlated genes analyzed in LinkedOmics (Spearman correlation test).
Query	Statistic	P-value	FDR (BH)	Event_SD	Event_TD
AKAP2	-0.618725	1.43122e-40	1.78205e-37	371	346
KIAA1370	-0.618204	1.73664e-40	2.03514e-37	371	371
SNRK	-0.611198	2.2591e-39	1.80024e-36	371	371
SECISBP2L	-0.607905	7.38047e-39	5.2512e-36	371	371
C9orf102	-0.597791	2.57244e-37	1.55298e-34	371	371
JMJD1C	-0.596388	4.16829e-37	2.37259e-34	371	371
WWC2	-0.593655	1.06003e-36	5.70755e-34	371	371
MEF2A	-0.587711	7.83068e-36	3.54552e-33	371	371
KIAA1109	-0.585612	1.57117e-35	6.52099e-33	371	371
KLHL28	-0.585409	1.68056e-35	6.83266e-33	371	371
PDLIM5	-0.585004	1.92092e-35	7.6537e-33	371	371
TTBK2	-0.580205	9.2315e-35	3.22649e-32	371	371
HIPK3	-0.579279	1.24614e-34	4.1376e-32	371	371
AFF1	-0.575532	4.15404e-34	1.27318e-31	371	371
PIK3C2A	-0.575244	4.55384e-34	1.37457e-31	371	371
RAPGEF2	-0.574833	5.19134e-34	1.54361e-31	371	371
REST	-0.571567	1.46034e-33	4.09758e-31	371	370
MIER1	-0.570678	1.93166e-33	5.34479e-31	371	371
IL6ST	-0.569924	2.44656e-33	6.58654e-31	371	371
MAN1A2	-0.569756	2.57919e-33	6.85102e-31	371	371
SASH1	-0.568716	3.56983e-33	9.00229e-31	371	371
FNIP2	-0.566821	6.43357e-33	1.54421e-30	371	371
PPAP2B	-0.564649	1.25806e-32	2.69495e-30	371	371
PLSCR4	-0.564077	1.49975e-32	3.14504e-30	371	371
KLHL8	-0.563869	1.59874e-32	3.31772e-30	371	371
PPTC7	-0.563094	2.02748e-32	4.03914e-30	371	371
ANKRD17	-0.562716	2.2757e-32	4.44476e-30	371	371
C4orf29	-0.562189	2.67318e-32	5.1704e-30	371	371
FRMD4B	-0.559702	5.69035e-32	1.07965e-29	371	371
C9orf41	-0.5596	5.86803e-32	1.10286e-29	371	370
DNAJB14	-0.559516	6.01895e-32	1.12065e-29	371	371
FAM63B	-0.559455	6.13068e-32	1.13088e-29	371	371
MAP3K2	-0.559407	6.22141e-32	1.13709e-29	371	371
MEGF9	-0.559315	6.39672e-32	1.1585e-29	371	371
ARHGAP29	-0.558396	8.43941e-32	1.51468e-29	371	371
ARL15	-0.55812	9.17063e-32	1.61679e-29	371	371
CLOCK	-0.557911	9.76615e-32	1.70668e-29	371	371
ELK3	-0.55768	1.04667e-31	1.79757e-29	371	370
RNF160	-0.557435	1.12666e-31	1.90215e-29	371	371
BIRC6	-0.557037	1.26936e-31	2.08994e-29	371	371
USO1	-0.556974	1.29352e-31	2.11225e-29	371	371
KIAA2018	-0.556896	1.32436e-31	2.14503e-29	371	371
KIAA2026	-0.556195	1.63361e-31	2.60359e-29	371	371
DOCK9	-0.55523	2.17888e-31	3.39122e-29	371	371
ARHGEF12	-0.55471	2.54361e-31	3.86822e-29	371	371
CASC4	-0.554325	2.85149e-31	4.27123e-29	371	371
ADAM10	-0.552857	4.40533e-31	6.50096e-29	371	371
TBCEL	-0.550517	8.77585e-31	1.25053e-28	371	371
OSBPL8	-0.550512	8.78795e-31	1.25053e-28	371	371
UBR1	-0.550459	8.92602e-31	1.26116e-28	371	371
ZDHHC20	-0.550271	9.43044e-31	1.32305e-28	371	364
BMPR2	-0.550099	9.91839e-31	1.38178e-28	371	371
ZNF366	-0.548232	1.7105e-30	2.31813e-28	371	351
PRKG1	-0.548036	1.81097e-30	2.43771e-28	371	343
DCUN1D1	-0.546401	2.90997e-30	3.74016e-28	371	371
RBM43	-0.545344	3.94795e-30	4.9157e-28	371	371
NBEAL1	-0.544537	4.98089e-30	6.08769e-28	371	371
XRN1	-0.543493	6.71966e-30	8.06441e-28	371	371
CCNT1	-0.54309	7.54074e-30	8.88915e-28	371	363
DPP8	-0.541375	1.23012e-29	1.40842e-27	371	371
TMF1	-0.54065	1.51138e-29	1.71078e-27	371	371
KIAA1012	-0.540435	1.60637e-29	1.80802e-27	371	371
C10orf118	-0.540027	1.80293e-29	1.98442e-27	371	371
REV3L	-0.539791	1.92772e-29	2.11012e-27	371	371
C5orf41	-0.539471	2.11035e-29	2.27256e-27	371	371
FUBP3	-0.539205	2.27498e-29	2.43668e-27	371	371
USP12	-0.539081	2.35613e-29	2.5101e-27	371	371
OTUD4	-0.538929	2.45937e-29	2.57872e-27	371	371
SYNE1	-0.538834	2.52597e-29	2.62267e-27	371	371
SERINC1	-0.538832	2.52762e-29	2.62267e-27	371	371
ARID4A	-0.538786	2.56026e-29	2.64278e-27	371	371
ETS1	-0.537048	4.17378e-29	4.24235e-27	371	371
GTF2A1	-0.536985	4.24793e-29	4.2958e-27	371	369
PIKFYVE	-0.536788	4.4886e-29	4.51454e-27	371	371
REL	-0.536772	4.50955e-29	4.51454e-27	371	370
SEC24B	-0.535221	6.95355e-29	6.85785e-27	371	371
MAN1A1	-0.535085	7.22163e-29	7.08716e-27	371	371
GOLIM4	-0.534616	8.22961e-29	7.95875e-27	371	371
FRYL	-0.534441	8.63894e-29	8.27428e-27	371	371
SPATA13	-0.533347	1.17015e-28	1.08511e-26	371	371
KIAA1432	-0.533171	1.22888e-28	1.12819e-26	371	371
FAT4	-0.53275	1.38057e-28	1.26163e-26	371	368
ASXL2	-0.53241	1.51619e-28	1.37925e-26	371	371
UHMK1	-0.532386	1.52626e-28	1.3821e-26	371	371
PIK3R4	-0.531544	1.92494e-28	1.71199e-26	371	371
RC3H2	-0.531511	1.94293e-28	1.72031e-26	371	371
QKI	-0.531321	2.04707e-28	1.8045e-26	371	371
SBNO1	-0.530992	2.24036e-28	1.96231e-26	371	367
MAPK8	-0.530984	2.2458e-28	1.96231e-26	371	369
NHSL2	-0.529371	3.49361e-28	2.97434e-26	371	350
CENPC1	-0.528736	4.15416e-28	3.47962e-26	371	371
ATP13A3	-0.527985	5.09777e-28	4.21402e-26	371	371
TET2	-0.527895	5.22434e-28	4.3008e-26	371	371
VPS13C	-0.527571	5.70526e-28	4.63919e-26	371	371
SACM1L	-0.527525	5.77569e-28	4.67737e-26	371	371
HEATR5A	-0.527502	5.8129e-28	4.68844e-26	371	371
EPAS1	-0.527248	6.22797e-28	4.99675e-26	371	371
MAGI1	-0.526803	7.02516e-28	5.48844e-26	371	371
SMG1	-0.526746	7.13424e-28	5.55189e-26	371	371
MIA2	-0.526517	7.59149e-28	5.88474e-26	371	367
KIAA1033	-0.526444	7.74236e-28	5.97842e-26	371	371
SON	-0.526358	7.92559e-28	6.09628e-26	371	371
ROCK1	-0.526267	8.12239e-28	6.22363e-26	371	371
KBTBD7	-0.526216	8.2357e-28	6.28627e-26	371	371
TCF12	-0.525756	9.32541e-28	6.95808e-26	371	371
PROX1	-0.525687	9.50082e-28	7.01642e-26	371	370
HERC3	-0.525538	9.89004e-28	7.27045e-26	371	371
GNAQ	-0.525311	1.05141e-27	7.67259e-26	371	371
SUCNR1	-0.525121	1.10675e-27	8.04695e-26	371	342
WDFY3	-0.524641	1.25946e-27	9.05808e-26	371	371
SETD7	-0.524531	1.29725e-27	9.26305e-26	371	371
METTL14	-0.524473	1.31773e-27	9.37563e-26	371	371
SCYL2	-0.524393	1.34609e-27	9.54337e-26	371	371
TSTD2	-0.523958	1.51315e-27	1.06897e-25	371	371
N4BP2	-0.523896	1.53845e-27	1.083e-25	371	369
C4orf41	-0.523855	1.55562e-27	1.09124e-25	371	371
SMARCA2	-0.52316	1.87373e-27	1.29613e-25	371	371
ZNF791	-0.523022	1.94442e-27	1.34037e-25	371	371
LOC284441	-0.522729	2.10287e-27	1.4347e-25	371	367
ZEB1	-0.521731	2.74493e-27	1.86637e-25	371	371
IREB2	-0.521615	2.83085e-27	1.91824e-25	371	371
TSHZ1	-0.521036	3.30199e-27	2.20746e-25	371	371
UGCG	-0.520386	3.92424e-27	2.59196e-25	371	370
ARHGAP5	-0.520373	3.93774e-27	2.59196e-25	371	371
LARP1B	-0.51991	4.45193e-27	2.90791e-25	371	371
ANKRD12	-0.519482	4.98616e-27	3.22514e-25	371	371
FEM1B	-0.519345	5.16942e-27	3.3221e-25	371	371
DMXL1	-0.519245	5.3078e-27	3.40006e-25	371	371
MYST4	-0.519013	5.64364e-27	3.5921e-25	371	371
DDI2	-0.518439	6.56556e-27	4.15235e-25	371	358
RAPGEF6	-0.518391	6.64909e-27	4.17865e-25	371	370
EVI5	-0.517997	7.3754e-27	4.61839e-25	371	371
EXOC6B	-0.517963	7.44154e-27	4.61839e-25	371	369
UBXN4	-0.517804	7.75973e-27	4.78605e-25	371	371
USP53	-0.517374	8.68949e-27	5.29395e-25	371	371
SSFA2	-0.517201	9.09318e-27	5.50621e-25	371	371
HIPK1	-0.517101	9.33435e-27	5.63512e-25	371	371
RALGAPA2	-0.516612	1.06107e-26	6.34794e-25	371	371
IPMK	-0.515477	1.42754e-26	8.34002e-25	371	358
ITGA1	-0.514967	1.63074e-26	9.44407e-25	371	371
CMTM6	-0.514777	1.71323e-26	9.86447e-25	371	371
LCOR	-0.514609	1.78986e-26	1.0276e-24	371	370
FBXO8	-0.514179	2.00166e-26	1.13934e-24	371	371
MACF1	-0.514157	2.01301e-26	1.14254e-24	371	371
SFRS2IP	-0.514092	2.04741e-26	1.15524e-24	371	371
SOS2	-0.514082	2.05279e-26	1.15524e-24	371	371
CHD9	-0.513803	2.20683e-26	1.23844e-24	371	371
ATXN7	-0.513096	2.65115e-26	1.48049e-24	371	371
LEPROT	-0.513018	2.70462e-26	1.50507e-24	371	370
EXOC5	-0.512667	2.96231e-26	1.64388e-24	371	371
RUNX1T1	-0.512583	3.02712e-26	1.67517e-24	371	315
ARL5B	-0.512423	3.15471e-26	1.73613e-24	371	371
PTAR1	-0.511233	4.28719e-26	2.32723e-24	371	371
MAML2	-0.510559	5.09882e-26	2.73797e-24	371	370
KIRREL	-0.510089	5.75205e-26	3.06465e-24	371	344
KDR	-0.510088	5.75333e-26	3.06465e-24	371	371
CLCN3	-0.509817	6.16769e-26	3.2766e-24	371	371
PIK3CA	-0.50974	6.28912e-26	3.3146e-24	371	371
LATS1	-0.509565	6.57866e-26	3.4399e-24	371	371
PCDHGB7	-0.508945	7.70699e-26	4.00884e-24	371	351
GPR116	-0.508909	7.77935e-26	4.03594e-24	371	371
PCNX	-0.508752	8.09773e-26	4.17935e-24	371	371
CDK17	-0.508362	8.9439e-26	4.56873e-24	371	371
SBF2	-0.507962	9.90409e-26	5.0334e-24	371	371
BOD1L	-0.50792	1.00085e-25	5.0735e-24	371	371
RP2	-0.507676	1.065e-25	5.38498e-24	371	371
NHLRC2	-0.507597	1.0866e-25	5.48033e-24	371	370
ACAP2	-0.507506	1.11225e-25	5.59551e-24	371	371
SHPRH	-0.50744	1.13097e-25	5.67536e-24	371	370
PLDN	-0.507036	1.25302e-25	6.24065e-24	371	371
CCNT2	-0.506454	1.45224e-25	7.21485e-24	371	371
KIDINS220	-0.506204	1.54741e-25	7.61174e-24	371	371
DHX33	-0.506072	1.59985e-25	7.83102e-24	371	370
UBA6	-0.505685	1.76442e-25	8.57338e-24	371	371
RNF111	-0.505346	1.92192e-25	9.2708e-24	371	371
NCOA2	-0.505187	2.0005e-25	9.60335e-24	371	371
EP300	-0.505019	2.08697e-25	9.99437e-24	371	371
ERN1	-0.504771	2.22169e-25	1.05724e-23	371	371
MYCBP2	-0.504205	2.56209e-25	1.20382e-23	371	371
C9orf129	-0.503917	2.75397e-25	1.2879e-23	371	360
KLHL24	-0.503905	2.76259e-25	1.28891e-23	371	371
MED13L	-0.50354	3.02744e-25	1.39937e-23	371	371
STRN3	-0.503396	3.13887e-25	1.44417e-23	371	371
PLEKHG1	-0.503198	3.29889e-25	1.51082e-23	371	371
FBXL3	-0.501527	5.0083e-25	2.25227e-23	371	371
PJA2	-0.500943	5.79222e-25	2.56999e-23	371	371
GABPA	-0.500727	6.11162e-25	2.70568e-23	371	371
TRPM7	-0.500254	6.87388e-25	3.02299e-23	371	371
MORC3	-0.500233	6.90874e-25	3.03163e-23	371	371
KIAA0355	-0.49985	7.59715e-25	3.31909e-23	371	371
OSBPL11	-0.499688	7.90789e-25	3.43227e-23	371	371
ZC3H13	-0.499658	7.96859e-25	3.45109e-23	371	371
USP8	-0.499077	9.20063e-25	3.95032e-23	371	371
RNF168	-0.4989	9.60975e-25	4.09947e-23	371	371
SAMD8	-0.498887	9.64098e-25	4.10401e-23	371	371
RBL2	-0.498821	9.79996e-25	4.16279e-23	371	371
ELF1	-0.498754	9.96377e-25	4.22336e-23	371	371
FAM73A	-0.498668	1.01781e-24	4.30507e-23	371	371
HECTD1	-0.498519	1.0558e-24	4.45628e-23	371	371
SGK269	-0.498448	1.07447e-24	4.52548e-23	371	371
MYO9A	-0.498089	1.17391e-24	4.90285e-23	371	370
TMEM184C	-0.498003	1.19923e-24	4.99813e-23	371	371
KIAA0494	-0.497444	1.37604e-24	5.70745e-23	371	371
PAFAH1B2	-0.497438	1.378e-24	5.70745e-23	371	371
TAOK1	-0.497389	1.3946e-24	5.75222e-23	371	371
TMOD3	-0.497318	1.41915e-24	5.82935e-23	371	371
NCOA1	-0.497191	1.46429e-24	6.0024e-23	371	371
ZNF776	-0.497099	1.49762e-24	6.12641e-23	371	371
FAM122A	-0.496673	1.66261e-24	6.78739e-23	371	371
TGFBR2	-0.496596	1.69462e-24	6.90395e-23	371	371
SEC24D	-0.496559	1.70983e-24	6.95167e-23	371	371
TOPORS	-0.4965	1.73498e-24	7.03956e-23	371	371
SEC23A	-0.496278	1.83182e-24	7.41737e-23	371	371
DENND2C	-0.495974	1.97325e-24	7.95772e-23	371	371
SPG11	-0.495694	2.11308e-24	8.48724e-23	371	371
LATS2	-0.49534	2.30402e-24	9.16182e-23	371	371
SLC12A6	-0.495315	2.31835e-24	9.20041e-23	371	371
ZNF192	-0.495293	2.3308e-24	9.23145e-23	371	371
ZNF641	-0.494726	2.67635e-24	1.05372e-22	371	370
KIAA0247	-0.494258	2.99958e-24	1.17402e-22	371	371
KIAA0754	-0.494209	3.03587e-24	1.1859e-22	371	370
RAB33B	-0.494147	3.08182e-24	1.20059e-22	371	371
ETV3	-0.494081	3.13183e-24	1.21622e-22	371	366
ZNF609	-0.493979	3.2099e-24	1.2417e-22	371	371
ANKRD36BP1	-0.493754	3.39039e-24	1.30898e-22	371	360
SYNJ1	-0.493536	3.57521e-24	1.37767e-22	371	371
ALS2CR8	-0.493461	3.64088e-24	1.40026e-22	371	371
ATG2B	-0.493448	3.65248e-24	1.40202e-22	371	371
DENND4A	-0.493336	3.75267e-24	1.4377e-22	371	371
GOLGA4	-0.493085	3.98788e-24	1.52197e-22	371	371
FCHO2	-0.493065	4.00729e-24	1.52645e-22	371	371
ATE1	-0.493051	4.02124e-24	1.52884e-22	371	371
ZNF281	-0.492762	4.31307e-24	1.62123e-22	371	371
STRN	-0.492458	4.64192e-24	1.73828e-22	371	371
UBR3	-0.492082	5.08337e-24	1.88587e-22	371	371
DDR2	-0.491997	5.18962e-24	1.9217e-22	371	366
ANKRD50	-0.49178	5.46838e-24	2.02117e-22	371	371
PCDH17	-0.491102	6.43987e-24	2.36271e-22	371	371
PCYOX1	-0.491087	6.46182e-24	2.3664e-22	371	371
CDKL5	-0.491017	6.57162e-24	2.4022e-22	371	308
MAST4	-0.490539	7.37355e-24	2.66116e-22	371	371
SLC35D1	-0.490512	7.42207e-24	2.67383e-22	371	371
USP38	-0.490496	7.449e-24	2.67868e-22	371	371
CSGALNACT2	-0.48976	8.88993e-24	3.18535e-22	371	371
HERC1	-0.489749	8.91325e-24	3.18797e-22	371	371
PEX13	-0.489563	9.31912e-24	3.31952e-22	371	371
BAG4	-0.489337	9.83739e-24	3.481e-22	371	371
CNOT6L	-0.489068	1.0491e-23	3.69261e-22	371	371
LIMS1	-0.488684	1.1501e-23	4.03386e-22	371	371
AP1AR	-0.488564	1.1836e-23	4.14406e-22	371	371
ITSN1	-0.48848	1.20739e-23	4.21993e-22	371	371
RGPD3	-0.488377	1.23737e-23	4.31714e-22	371	371
ARFIP1	-0.488274	1.26821e-23	4.40161e-22	371	371
ZFP91	-0.488115	1.31741e-23	4.55651e-22	371	371
JAK2	-0.487786	1.42464e-23	4.91883e-22	371	371
PALM2-AKAP2	-0.487362	1.57601e-23	5.41332e-22	371	371
SMAD1	-0.486962	1.7332e-23	5.90238e-22	371	371
2022-09-11	-0.486933	1.74532e-23	5.93348e-22	371	371
HMBOX1	-0.486035	2.15944e-23	7.25471e-22	371	371
ERC1	-0.485785	2.29139e-23	7.68504e-22	371	371
CDH5	-0.485628	2.37797e-23	7.94865e-22	371	371
2022-03-08	-0.485462	2.47297e-23	8.23856e-22	371	371
CELF1	-0.485258	2.59513e-23	8.6167e-22	371	371
MOBKL1B	-0.485204	2.62822e-23	8.71205e-22	371	371
KIAA1430	-0.484724	2.94367e-23	9.7415e-22	371	371
PTPLB	-0.484159	3.36257e-23	1.11093e-21	371	371
CPEB4	-0.483818	3.64371e-23	1.19983e-21	371	371
TEK	-0.483746	3.70593e-23	1.21831e-21	371	371
DENND4C	-0.483342	4.07495e-23	1.33084e-21	371	371
CLIC4	-0.483249	4.16482e-23	1.35133e-21	371	371
SERINC5	-0.483209	4.20462e-23	1.35981e-21	371	370
SMARCAD1	-0.483111	4.30167e-23	1.38895e-21	371	371
UBXN7	-0.482662	4.77962e-23	1.53828e-21	371	371
NEK1	-0.482491	4.9748e-23	1.59594e-21	371	371
TMEM30A	-0.481958	5.63497e-23	1.80192e-21	371	371
ATM	-0.48141	6.40474e-23	2.03501e-21	371	371
ZNF654	-0.481271	6.61535e-23	2.09858e-21	371	371
EBF2	-0.480972	7.09171e-23	2.239e-21	371	309
G3BP2	-0.48018	8.52703e-23	2.6668e-21	371	371
FAM179B	-0.480139	8.60877e-23	2.68815e-21	371	371
MBNL1	-0.48013	8.62605e-23	2.68933e-21	371	371
SLMAP	-0.479976	8.94148e-23	2.77465e-21	371	371
DOCK1	-0.47954	9.89387e-23	3.05117e-21	371	371
MON2	-0.479025	1.11462e-22	3.42149e-21	371	371
FCHSD2	-0.478723	1.19517e-22	3.65747e-21	371	371
SRBD1	-0.478521	1.2524e-22	3.82086e-21	371	371
ZMYND11	-0.478367	1.29763e-22	3.95282e-21	371	371
FLT1	-0.478346	1.30397e-22	3.96605e-21	371	371
GAB1	-0.478183	1.35404e-22	4.10582e-21	371	371
ADAMTS15	-0.47817	1.35821e-22	4.11221e-21	371	313
MFAP3	-0.477984	1.41758e-22	4.26602e-21	371	371
ATRX	-0.477854	1.46068e-22	4.38908e-21	371	371
FAM168A	-0.47771	1.51009e-22	4.51713e-21	371	371
NRIP1	-0.477377	1.63036e-22	4.84778e-21	371	371
RASA2	-0.47712	1.72964e-22	5.13531e-21	371	365
KIAA0776	-0.477092	1.74104e-22	5.16146e-21	371	371
EIF2C4	-0.476585	1.95627e-22	5.74821e-21	371	371
RSBN1	-0.476488	2.00012e-22	5.86295e-21	371	371
CALCRL	-0.476486	2.00121e-22	5.86295e-21	371	371
TNRC6B	-0.476247	2.11366e-22	6.17424e-21	371	371
2022-09-10	-0.476239	2.11775e-22	6.17713e-21	371	371
KLF3	-0.476169	2.15228e-22	6.26866e-21	371	371
ZFX	-0.476098	2.1872e-22	6.36107e-21	371	371
PPFIBP1	-0.475997	2.23859e-22	6.50106e-21	371	371
CYSLTR1	-0.475923	2.27673e-22	6.59259e-21	371	366
STAG1	-0.475419	2.55544e-22	7.36752e-21	371	371
LOC653653	-0.475293	2.62979e-22	7.5491e-21	371	364
TNS1	-0.47526	2.64962e-22	7.59506e-21	371	371
CHD6	-0.474982	2.82382e-22	8.08279e-21	371	371
SMEK2	-0.474638	3.05437e-22	8.71765e-21	371	371
ATF2	-0.474475	3.16973e-22	9.03397e-21	371	371
WDR11	-0.473488	3.96846e-22	1.12781e-20	371	371
TANK	-0.473431	4.02053e-22	1.14098e-20	371	371
RAD54L2	-0.473209	4.22783e-22	1.19302e-20	371	371
ARFGEF2	-0.473077	4.35666e-22	1.22763e-20	371	371
BNIP2	-0.472898	4.53734e-22	1.27674e-20	371	371
RNF169	-0.47286	4.57648e-22	1.28593e-20	371	371
EHBP1	-0.472804	4.63489e-22	1.29686e-20	371	371
DPY19L3	-0.472719	4.72578e-22	1.32044e-20	371	371
ACER2	-0.47271	4.73514e-22	1.3212e-20	371	365
SLK	-0.47258	4.87616e-22	1.35674e-20	371	371
TGFBRAP1	-0.472253	5.25124e-22	1.4565e-20	371	367
PRKAA1	-0.472202	5.31293e-22	1.46686e-20	371	371
PRKAR2A	-0.472199	5.3161e-22	1.46686e-20	371	371
FNDC3A	-0.472103	5.43266e-22	1.49695e-20	371	371
NF1	-0.471927	5.65325e-22	1.55344e-20	371	371
MPZL3	-0.471681	5.97674e-22	1.63781e-20	371	364
PTPN11	-0.471502	6.22394e-22	1.69854e-20	371	371
FAM114A1	-0.470715	7.4318e-22	2.00618e-20	371	371
RAB14	-0.470619	7.59479e-22	2.04741e-20	371	371
LCA5	-0.470588	7.64797e-22	2.05896e-20	371	369
SLC10A7	-0.470568	7.68223e-22	2.06539e-20	371	371
EDIL3	-0.470552	7.70972e-22	2.06999e-20	371	337
CCPG1	-0.47045	7.88799e-22	2.115e-20	371	371
ERBB2IP	-0.470295	8.16768e-22	2.18412e-20	371	371
SETX	-0.470261	8.23155e-22	2.1953e-20	371	371
BDP1	-0.470236	8.27702e-22	2.20448e-20	371	371
LOC150786	-0.470162	8.41664e-22	2.23451e-20	371	370
LRBA	-0.470158	8.42343e-22	2.23451e-20	371	371
RIF1	-0.469858	9.0108e-22	2.38714e-20	371	371
GNG12	-0.469807	9.11572e-22	2.40867e-20	371	371
CCNI	-0.469772	9.18718e-22	2.42337e-20	371	371
TRUB1	-0.469353	1.00921e-21	2.63506e-20	371	371
RDX	-0.469272	1.02789e-21	2.68031e-20	371	371
MYSM1	-0.469213	1.04143e-21	2.70852e-20	371	371
ABCA1	-0.469179	1.04932e-21	2.72549e-20	371	371
PTPRB	-0.468823	1.13644e-21	2.94794e-20	371	371
PDE10A	-0.468723	1.16232e-21	3.01115e-20	371	370
CDKN2AIP	-0.468697	1.16909e-21	3.02476e-20	371	371
PDZD8	-0.468394	1.25085e-21	3.22373e-20	371	371
ATP11B	-0.467667	1.47145e-21	3.75343e-20	371	371
SLC41A2	-0.467519	1.52071e-21	3.87412e-20	371	371
STX17	-0.467459	1.54119e-21	3.91731e-20	371	371
AKAP10	-0.467458	1.5416e-21	3.91731e-20	371	370
NR2F2	-0.467447	1.54537e-21	3.92189e-20	371	371
AQR	-0.467116	1.6635e-21	4.20561e-20	371	371
MYLK	-0.467058	1.68498e-21	4.25453e-20	371	371
SLC30A6	-0.466567	1.87965e-21	4.73406e-20	371	371
SEC24A	-0.466351	1.97194e-21	4.94773e-20	371	371
EMP1	-0.466178	2.04921e-21	5.12869e-20	371	371
ACTR2	-0.465998	2.13269e-21	5.32424e-20	371	371
TRIP11	-0.465959	2.151e-21	5.36324e-20	371	371
ABHD2	-0.465874	2.19175e-21	5.4444e-20	371	371
MTMR6	-0.465842	2.2077e-21	5.47717e-20	371	371
IRF2	-0.465711	2.27247e-21	5.62766e-20	371	371
APOOL	-0.465704	2.27631e-21	5.62766e-20	371	371
USP34	-0.465475	2.39457e-21	5.91135e-20	371	371
TAB2	-0.465382	2.44434e-21	6.01929e-20	371	371
BCLAF1	-0.465366	2.45287e-21	6.03284e-20	371	371
LIG4	-0.465173	2.56025e-21	6.28145e-20	371	371
C14orf43	-0.464354	3.0676e-21	7.48014e-20	371	371
BACH1	-0.463805	3.46198e-21	8.39045e-20	371	371
BAZ2B	-0.463786	3.47653e-21	8.40899e-20	371	371
ITPR1	-0.463594	3.62671e-21	8.74714e-20	371	371
MKL2	-0.463541	3.66907e-21	8.83861e-20	371	371
TCP11L2	-0.463046	4.09102e-21	9.79875e-20	371	371
SENP7	-0.463044	4.09224e-21	9.79875e-20	371	371
ZNF699	-0.462911	4.21351e-21	1.00649e-19	371	332
MAN2A1	-0.462873	4.24891e-21	1.01374e-19	371	371
FAM115A	-0.462783	4.3342e-21	1.03161e-19	371	371
TEAD1	-0.462711	4.40264e-21	1.04665e-19	371	371
TRIM44	-0.462681	4.43179e-21	1.05233e-19	371	371
AKAP11	-0.462214	4.9093e-21	1.15743e-19	371	371
POLK	-0.462195	4.93006e-21	1.15959e-19	371	371
CTNND1	-0.461858	5.30715e-21	1.24681e-19	371	371
P2RY1	-0.46173	5.45776e-21	1.28068e-19	371	350
SFMBT2	-0.461666	5.53461e-21	1.29262e-19	371	357
UBL3	-0.461642	5.5637e-21	1.29789e-19	371	371
EPC1	-0.461315	5.97664e-21	1.39097e-19	371	370
YTHDC2	-0.461289	6.00993e-21	1.39708e-19	371	371
ROCK2	-0.461262	6.04615e-21	1.40386e-19	371	371
ZBTB43	-0.461191	6.13968e-21	1.42392e-19	371	371
PDE8A	-0.461141	6.20796e-21	1.43808e-19	371	371
CACNA2D1	-0.461072	6.30157e-21	1.45807e-19	371	255
NEU3	-0.460842	6.62626e-21	1.52787e-19	371	370
ZNF148	-0.460716	6.81036e-21	1.56851e-19	371	371
TSC22D2	-0.460296	7.46214e-21	1.71443e-19	371	371
TBC1D23	-0.460292	7.46978e-21	1.71443e-19	371	371
BMP2K	-0.460065	7.84808e-21	1.79919e-19	371	371
ZEB2	-0.459916	8.10639e-21	1.85627e-19	371	371
RAPH1	-0.459793	8.32598e-21	1.90437e-19	371	371
NFATC2	-0.459662	8.56607e-21	1.95703e-19	371	342
EDEM1	-0.45927	9.32605e-21	2.1256e-19	371	371
LPHN2	-0.458794	1.03393e-20	2.33537e-19	371	371
NCK1	-0.458637	1.06977e-20	2.41086e-19	371	371
DOCK5	-0.458619	1.07397e-20	2.41759e-19	371	371
APC	-0.458604	1.07741e-20	2.4226e-19	371	371
SNX4	-0.458189	1.17855e-20	2.64701e-19	371	371
PPP4R2	-0.458183	1.18011e-20	2.64754e-19	371	371
CLASP1	-0.457963	1.23755e-20	2.76706e-19	371	371
ARHGEF6	-0.4579	1.2546e-20	2.80203e-19	371	371
FAM198B	-0.45783	1.27356e-20	2.84118e-19	371	371
ARID1B	-0.457456	1.38061e-20	3.06627e-19	371	371
NBPF10	-0.457332	1.41801e-20	3.14583e-19	371	369
FAM190B	-0.457046	1.50814e-20	3.33834e-19	371	371
LDB2	-0.456735	1.61258e-20	3.55373e-19	371	371
TLR4	-0.456422	1.72483e-20	3.79273e-19	371	371
EIF2AK4	-0.456414	1.72793e-20	3.79535e-19	371	371
PCDHGA12	-0.456388	1.73753e-20	3.81224e-19	371	335
PKN2	-0.456296	1.77208e-20	3.87523e-19	371	371
EPC2	-0.455983	1.8952e-20	4.12637e-19	371	371
HEG1	-0.455914	1.92337e-20	4.174e-19	371	371
MUDENG	-0.455834	1.957e-20	4.24236e-19	371	371
KL	-0.455778	1.98027e-20	4.28349e-19	371	367
FGD4	-0.45555	2.07959e-20	4.48859e-19	371	371
SLC30A4	-0.455526	2.09017e-20	4.50653e-19	371	359
SPRED2	-0.455441	2.12859e-20	4.5844e-19	371	371
SLC35A5	-0.455286	2.20064e-20	4.72937e-19	371	371
GVIN1	-0.455249	2.21799e-20	4.76152e-19	371	370
CDC14C	-0.455136	2.27236e-20	4.87297e-19	371	350
C10orf128	-0.455023	2.32815e-20	4.98725e-19	371	346
FAM108B1	-0.454748	2.46923e-20	5.27811e-19	371	371
PLEKHM3	-0.454731	2.47791e-20	5.29098e-19	371	371
PPP1R12A	-0.453933	2.93821e-20	6.22714e-19	371	371
SH2B3	-0.453754	3.05213e-20	6.46169e-19	371	371
PATL1	-0.453657	3.11627e-20	6.59048e-19	371	371
TECTA	-0.453375	3.30835e-20	6.98187e-19	371	360
LRP6	-0.453344	3.3309e-20	7.02204e-19	371	371
CLPX	-0.45318	3.44871e-20	7.2627e-19	371	371
EIF2AK3	-0.452788	3.748e-20	7.86803e-19	371	371
TAF13	-0.452607	3.89504e-20	8.12762e-19	371	370
RSC1A1	-0.452602	3.89961e-20	8.12762e-19	371	371
HIVEP2	-0.452531	3.95882e-20	8.23252e-19	371	371
KIAA0564	-0.452467	4.01283e-20	8.33614e-19	371	371
RCHY1	-0.452326	4.13432e-20	8.55285e-19	371	371
LRRC40	-0.452189	4.25618e-20	8.79581e-19	371	371
LYSMD3	-0.452171	4.27215e-20	8.81967e-19	371	371
GNA11	-0.452148	4.29284e-20	8.8532e-19	371	371
ITGB1	-0.452088	4.34814e-20	8.95798e-19	371	371
RNF125	-0.452057	4.37691e-20	9.00794e-19	371	371
LGR4	-0.451859	4.56422e-20	9.37405e-19	371	371
KLHL11	-0.451853	4.56988e-20	9.37601e-19	371	363
RASSF3	-0.451582	4.83987e-20	9.91975e-19	371	364
TMED7	-0.451529	4.89464e-20	1.00217e-18	371	371
LIN54	-0.451451	4.97559e-20	1.01561e-18	371	371
MDN1	-0.451443	4.9838e-20	1.01625e-18	371	371
PRKCE	-0.451054	5.4113e-20	1.09892e-18	371	371
RGS7BP	-0.450878	5.61554e-20	1.13576e-18	371	305
VPS13D	-0.45082	5.68507e-20	1.14866e-18	371	371
USP25	-0.45069	5.84268e-20	1.17931e-18	371	371
RBM16	-0.450609	5.94323e-20	1.19839e-18	371	371
GMCL1	-0.450044	6.69387e-20	1.34295e-18	371	371
FRMD3	-0.449807	7.03609e-20	1.40877e-18	371	340
RSPRY1	-0.449773	7.08693e-20	1.41753e-18	371	371
DDX3X	-0.44975	7.12216e-20	1.42315e-18	371	371
CTDSPL2	-0.449673	7.23801e-20	1.44485e-18	371	371
GTF2H3	-0.44958	7.38004e-20	1.46878e-18	371	371
NR2C2	-0.449572	7.39234e-20	1.46976e-18	371	371
SERINC3	-0.449405	7.65658e-20	1.52078e-18	371	371
ITGB3	-0.449385	7.68882e-20	1.52566e-18	371	370
SSH1	-0.448995	8.34432e-20	1.64916e-18	371	371
DICER1	-0.448975	8.37991e-20	1.65456e-18	371	371
ZNF136	-0.448841	8.61886e-20	1.69707e-18	371	371
SYNE2	-0.4487	8.87605e-20	1.74559e-18	371	371
C5orf24	-0.448557	9.14744e-20	1.79542e-18	371	371
COL4A3BP	-0.448418	9.41589e-20	1.84629e-18	371	371
IRAK3	-0.448086	1.00933e-19	1.97136e-18	371	371
DYRK1A	-0.447929	1.04307e-19	2.03128e-18	371	371
SAV1	-0.447639	1.10819e-19	2.14969e-18	371	371
SETBP1	-0.447628	1.11068e-19	2.15244e-18	371	371
ZFPM2	-0.447606	1.1159e-19	2.16044e-18	371	368
LMBRD2	-0.447433	1.15683e-19	2.23533e-18	371	371
MOBKL1A	-0.447406	1.1633e-19	2.24566e-18	371	371
ZYG11B	-0.44738	1.16967e-19	2.25577e-18	371	371
ZBTB1	-0.447332	1.18154e-19	2.27646e-18	371	371
ZFP106	-0.447321	1.1842e-19	2.27833e-18	371	371
ITCH	-0.447319	1.18479e-19	2.27833e-18	371	371
IKZF3	-0.447216	1.21044e-19	2.3254e-18	371	313
HIAT1	-0.447196	1.21554e-19	2.33295e-18	371	371
VCL	-0.44714	1.22971e-19	2.35788e-18	371	371
LRCH1	-0.447015	1.26222e-19	2.41556e-18	371	371
AOC3	-0.446934	1.28376e-19	2.45208e-18	371	371
KIF16B	-0.446795	1.32151e-19	2.51934e-18	371	371
ZDHHC21	-0.446781	1.32535e-19	2.52424e-18	371	370
SOX7	-0.446568	1.38522e-19	2.63324e-18	371	371
C21orf91	-0.446558	1.3883e-19	2.63658e-18	371	371
SGMS2	-0.446092	1.52931e-19	2.89335e-18	371	371
ADAMTS12	-0.446002	1.55806e-19	2.94215e-18	371	358
PHF2	-0.445501	1.72881e-19	3.25532e-18	371	371
ARL13B	-0.445345	1.78561e-19	3.35278e-18	371	371
C6orf204	-0.445272	1.81298e-19	3.40095e-18	371	359
EIF4G3	-0.444947	1.9391e-19	3.6273e-18	371	371
HELZ	-0.444764	2.01378e-19	3.76346e-18	371	371
TM9SF2	-0.444495	2.12916e-19	3.95682e-18	371	371
HEATR5B	-0.444422	2.16146e-19	4.0131e-18	371	371
RSF1	-0.444286	2.22281e-19	4.11933e-18	371	371
KIAA1737	-0.443847	2.4336e-19	4.5016e-18	371	371
SH3D19	-0.443544	2.59028e-19	4.78697e-18	371	371
TPP2	-0.443465	2.63295e-19	4.86132e-18	371	371
CALD1	-0.443207	2.77623e-19	5.11637e-18	371	371
TNKS2	-0.442644	3.11713e-19	5.70243e-18	371	371
NAA30	-0.442634	3.12337e-19	5.7086e-18	371	371
WDFY1	-0.442385	3.28712e-19	5.99689e-18	371	371
MTMR9	-0.44233	3.32431e-19	6.05365e-18	371	371
ITGA8	-0.442303	3.34334e-19	6.08275e-18	371	296
SKIL	-0.44224	3.38633e-19	6.15424e-18	371	371
GCC2	-0.442218	3.40184e-19	6.17226e-18	371	371
PHC3	-0.442181	3.4279e-19	6.21389e-18	371	371
VPS4B	-0.442064	3.51094e-19	6.35285e-18	371	371
ELF2	-0.441689	3.79118e-19	6.8413e-18	371	371
OSBP	-0.441369	4.04757e-19	7.29735e-18	371	371
KIAA1958	-0.441333	4.07747e-19	7.34461e-18	371	370
HIVEP1	-0.441235	4.16006e-19	7.4866e-18	371	371
SLC31A1	-0.441219	4.17402e-19	7.50494e-18	371	371
NDUFS1	-0.441206	4.18501e-19	7.51792e-18	371	371
CHM	-0.4412	4.19036e-19	7.52076e-18	371	371
IL7R	-0.441145	4.23698e-19	7.59075e-18	371	343
ZKSCAN1	-0.440916	4.4406e-19	7.93413e-18	371	371
MGAT5	-0.440788	4.55786e-19	8.12907e-18	371	360
UBE3A	-0.440734	4.60842e-19	8.20456e-18	371	371
SLC10A6	-0.44034	4.99358e-19	8.86649e-18	371	286
ARHGAP21	-0.440279	5.05676e-19	8.96941e-18	371	371
WDR7	-0.440275	5.06054e-19	8.96941e-18	371	371
KLHL9	-0.440144	5.19721e-19	9.20346e-18	371	371
HMG20A	-0.439805	5.56816e-19	9.83412e-18	371	371
PLCL1	-0.43976	5.61985e-19	9.91433e-18	371	370
NUMB	-0.439757	5.62353e-19	9.91433e-18	371	371
KIAA1632	-0.439663	5.73134e-19	1.00955e-17	371	371
GHR	-0.439635	5.76381e-19	1.01437e-17	371	371
UTP14C	-0.439467	5.96447e-19	1.04783e-17	371	371
PPIP5K2	-0.43906	6.47826e-19	1.1331e-17	371	371
NIPSNAP3B	-0.438983	6.58094e-19	1.15005e-17	371	370
HECW2	-0.4389	6.69284e-19	1.16858e-17	371	371
STT3B	-0.438888	6.70798e-19	1.1702e-17	371	371
PPM1B	-0.438748	6.90113e-19	1.20179e-17	371	371
ZNF41	-0.438316	7.53311e-19	1.30841e-17	371	371
PKD2	-0.43811	7.85369e-19	1.35817e-17	371	371
DHFRL1	-0.437917	8.16553e-19	1.40965e-17	371	371
PDZD2	-0.43779	8.3784e-19	1.44515e-17	371	371
TJP1	-0.437703	8.52716e-19	1.46826e-17	371	371
KLHL15	-0.437584	8.73437e-19	1.50264e-17	371	371
CYLD	-0.437465	8.9469e-19	1.53788e-17	371	371
NFKB1	-0.437288	9.27298e-19	1.58845e-17	371	371
LNX2	-0.437244	9.35515e-19	1.59977e-17	371	371
PRRG1	-0.436855	1.01172e-18	1.72269e-17	371	371
SP3	-0.436819	1.01909e-18	1.73375e-17	371	371
IDE	-0.436542	1.07756e-18	1.82855e-17	371	371
RAB18	-0.436516	1.08325e-18	1.83664e-17	371	371
PPP1R12B	-0.436482	1.09061e-18	1.84755e-17	371	371
TCF4	-0.436472	1.09295e-18	1.84994e-17	371	371
NCRNA00120	-0.436412	1.10624e-18	1.87084e-17	371	353
SLC35F5	-0.436368	1.11608e-18	1.88429e-17	371	371
PUM2	-0.436196	1.15525e-18	1.94876e-17	371	371
PDPR	-0.436038	1.19258e-18	2.00663e-17	371	371
HPS5	-0.436032	1.1939e-18	2.00716e-17	371	371
MTM1	-0.435993	1.20341e-18	2.02144e-17	371	371
GPR176	-0.435983	1.20587e-18	2.02387e-17	371	365
FBXO3	-0.435977	1.2072e-18	2.02439e-17	371	371
MEIS3P1	-0.435728	1.26904e-18	2.12096e-17	371	371
PRMT10	-0.435196	1.41212e-18	2.35024e-17	371	371
GPRIN3	-0.435189	1.41398e-18	2.35137e-17	371	371
DPYD	-0.434986	1.47255e-18	2.44467e-17	371	371
SNAPC3	-0.434847	1.51405e-18	2.50939e-17	371	371
TAF1L	-0.434816	1.52354e-18	2.52302e-17	371	358
PTPRG	-0.434807	1.52645e-18	2.52574e-17	371	371
MAP4K5	-0.434766	1.53877e-18	2.54402e-17	371	371
BBS10	-0.43473	1.55019e-18	2.56076e-17	371	371
DST	-0.434591	1.59364e-18	2.62819e-17	371	371
SNX9	-0.434446	1.64069e-18	2.70354e-17	371	371
LRIG1	-0.434438	1.64325e-18	2.70553e-17	371	371
EPM2AIP1	-0.434384	1.66093e-18	2.73238e-17	371	371
PIK3CG	-0.434351	1.67198e-18	2.74829e-17	371	371
RREB1	-0.434237	1.7106e-18	2.80483e-17	371	371
NMD3	-0.434144	1.74247e-18	2.85473e-17	371	371
ACBD5	-0.433506	1.97921e-18	3.22666e-17	371	371
MOSPD2	-0.433362	2.03651e-18	3.31465e-17	371	371
ARHGAP42	-0.433321	2.05324e-18	3.33915e-17	371	371
TGOLN2	-0.433298	2.06292e-18	3.35215e-17	371	371
PIK3R1	-0.433285	2.06832e-18	3.35819e-17	371	371
CDC42EP3	-0.433267	2.07562e-18	3.36731e-17	371	371
USP9X	-0.433219	2.09546e-18	3.39673e-17	371	371
MPHOSPH9	-0.432956	2.20807e-18	3.56476e-17	371	371
TNFSF8	-0.432918	2.22483e-18	3.58891e-17	371	355
AKAP13	-0.432874	2.24419e-18	3.61721e-17	371	371
FAM13C	-0.432789	2.28279e-18	3.67011e-17	371	364
LOC650623	-0.432652	2.34578e-18	3.7627e-17	371	339
ZNF770	-0.432435	2.44868e-18	3.9123e-17	371	371
PPM1A	-0.432435	2.44887e-18	3.9123e-17	371	371
NCKAP1	-0.432311	2.5101e-18	4.0037e-17	371	371
PREX2	-0.432009	2.66501e-18	4.2406e-17	371	354
PDE3A	-0.431997	2.67135e-18	4.24729e-17	371	353
MLL3	-0.431463	2.96911e-18	4.69449e-17	371	371
TLR3	-0.431277	3.08049e-18	4.85903e-17	371	371
TTC37	-0.431035	3.23117e-18	5.09267e-17	371	370
PHLDB2	-0.430981	3.26628e-18	5.14394e-17	371	371
HERC2	-0.430903	3.31694e-18	5.21959e-17	371	371
MANEA	-0.430725	3.43514e-18	5.38857e-17	371	371
SLC33A1	-0.430671	3.47203e-18	5.44215e-17	371	371
PICALM	-0.430565	3.54562e-18	5.55313e-17	371	371
B3GNT2	-0.430524	3.57422e-18	5.58914e-17	371	371
CUL5	-0.430213	3.80072e-18	5.91546e-17	371	371
SEC14L1	-0.430035	3.93642e-18	6.11711e-17	371	371
ANKRD56	-0.429835	4.09425e-18	6.34752e-17	371	368
ANKRD44	-0.429751	4.16261e-18	6.44848e-17	371	370
C11orf30	-0.42935	4.50398e-18	6.96108e-17	371	371
CPEB3	-0.42933	4.522e-18	6.98351e-17	371	371
TBC1D8B	-0.42888	4.9389e-18	7.61854e-17	371	371
CASS4	-0.42883	4.98761e-18	7.6847e-17	371	366
TRIM23	-0.428404	5.42247e-18	8.32895e-17	371	371
ERCC6	-0.428394	5.4332e-18	8.33899e-17	371	371
SHROOM4	-0.428108	5.74617e-18	8.79902e-17	371	371
GOPC	-0.428026	5.83845e-18	8.91976e-17	371	371
CPEB2	-0.427997	5.87159e-18	8.96351e-17	371	371
MIB1	-0.427933	5.94614e-18	9.07037e-17	371	371
DAAM2	-0.427887	5.99939e-18	9.13933e-17	371	371
SLIT2	-0.427872	6.01712e-18	9.15761e-17	371	345
CLASP2	-0.427714	6.20622e-18	9.42381e-17	371	371
SOX5	-0.427705	6.21659e-18	9.43235e-17	371	370
DBT	-0.427579	6.37241e-18	9.66143e-17	371	371
TOR1AIP2	-0.427502	6.46825e-18	9.79927e-17	371	371
SLC30A9	-0.427439	6.54816e-18	9.9128e-17	371	371
IPP	-0.42741	6.5858e-18	9.96221e-17	371	371
LONP2	-0.42729	6.74169e-18	1.01748e-16	371	371
MLL5	-0.427116	6.97412e-18	1.05097e-16	371	371
PSD3	-0.427051	7.06398e-18	1.0629e-16	371	371
NR3C1	-0.426925	7.23936e-18	1.08765e-16	371	371
SEC31A	-0.426862	7.32822e-18	1.10017e-16	371	371
ATF7IP	-0.426783	7.44289e-18	1.11655e-16	371	371
SOCS6	-0.426574	7.7513e-18	1.16106e-16	371	371
ZNF354C	-0.426364	8.07588e-18	1.20877e-16	371	312
HCFC2	-0.426343	8.10881e-18	1.21279e-16	371	371
SPTBN1	-0.426116	8.47338e-18	1.26447e-16	371	371
SEL1L	-0.425611	9.34762e-18	1.38662e-16	371	371
ARPP19	-0.425416	9.70836e-18	1.43906e-16	371	371
LMAN1	-0.424785	1.09698e-17	1.61882e-16	371	371
ETFDH	-0.42444	1.17269e-17	1.72161e-16	371	371
NCOR1	-0.424177	1.2339e-17	1.80882e-16	371	371
EFHA2	-0.42406	1.26208e-17	1.8474e-16	371	371
PLS3	-0.423997	1.27759e-17	1.86874e-16	371	371
ERG	-0.423881	1.30657e-17	1.90833e-16	371	371
ZDHHC17	-0.423814	1.32348e-17	1.9316e-16	371	371
RAB6A	-0.423799	1.32718e-17	1.93559e-16	371	371
FAM126B	-0.423741	1.34221e-17	1.95608e-16	371	371
ZNF91	-0.423618	1.37447e-17	2.00161e-16	371	371
MAP4K3	-0.423541	1.39487e-17	2.02688e-16	371	371
HCG11	-0.423503	1.40536e-17	2.04064e-16	371	370
FILIP1	-0.423449	1.42005e-17	2.06048e-16	371	371
EPS15	-0.423442	1.42188e-17	2.06162e-16	371	371
KLHL23	-0.423423	1.42713e-17	2.06623e-16	371	364
ZNF510	-0.423217	1.48471e-17	2.14647e-16	371	371
FYTTD1	-0.423174	1.49713e-17	2.16286e-16	371	371
IL1R1	-0.42309	1.5216e-17	2.19662e-16	371	371
EFNB2	-0.423072	1.52684e-17	2.20258e-16	371	371
SIRT1	-0.422861	1.59004e-17	2.28878e-16	371	371
ITSN2	-0.422521	1.6976e-17	2.43833e-16	371	371
PEAR1	-0.422509	1.70132e-17	2.44191e-16	371	371
LOC100190986	-0.422234	1.79375e-17	2.57086e-16	371	369
LOC729176	-0.422119	1.83358e-17	2.62606e-16	371	367
SIRPB1	-0.422092	1.84321e-17	2.63797e-16	371	371
ASB7	-0.422033	1.86421e-17	2.6661e-16	371	371
SLC8A1	-0.421886	1.9173e-17	2.73613e-16	371	371
SGPP1	-0.421736	1.97323e-17	2.81192e-16	371	371
PUS10	-0.421692	1.98998e-17	2.83377e-16	371	371
ATAD2B	-0.421677	1.99598e-17	2.84028e-16	371	371
COG6	-0.421537	2.0502e-17	2.91536e-16	371	371
PPP3R1	-0.421475	2.07472e-17	2.94602e-16	371	371
NPAT	-0.420881	2.32407e-17	3.28369e-16	371	371
MBNL2	-0.420873	2.3277e-17	3.2865e-16	371	371
NBPF9	-0.420867	2.33053e-17	3.28816e-16	371	368
KIF13A	-0.420831	2.34644e-17	3.30826e-16	371	371
CHSY1	-0.420664	2.42236e-17	3.40566e-16	371	371
BRWD1	-0.420371	2.56158e-17	3.59632e-16	371	371
C7orf58	-0.420282	2.60535e-17	3.65519e-16	371	371
ARHGAP20	-0.420172	2.66083e-17	3.73041e-16	371	366
ADAT1	-0.419681	2.92133e-17	4.07554e-16	371	371
AP1G1	-0.419634	2.94787e-17	4.10969e-16	371	371
HS3ST3B1	-0.419507	3.01988e-17	4.20126e-16	371	367
C6orf211	-0.419278	3.15426e-17	4.37903e-16	371	371
PPP2R5E	-0.419215	3.19208e-17	4.42845e-16	371	371
NFAT5	-0.419156	3.22817e-17	4.4754e-16	371	371
PEX26	-0.419027	3.30856e-17	4.58367e-16	371	371
ANO6	-0.4189	3.38912e-17	4.69046e-16	371	371
TANC1	-0.418888	3.3967e-17	4.69599e-16	371	371
UEVLD	-0.418419	3.71278e-17	5.11875e-16	371	371
INHBC	-0.418384	3.73739e-17	5.14557e-16	371	370
ZNF462	-0.418269	3.81952e-17	5.24813e-16	371	366
ITGA9	-0.41823	3.8481e-17	5.28338e-16	371	370
ANTXR2	-0.417981	4.03406e-17	5.52165e-16	371	371
KLHL20	-0.417941	4.06404e-17	5.55688e-16	371	371
FBXW2	-0.417875	4.11548e-17	5.62204e-16	371	371
GIMAP6	-0.417811	4.16589e-17	5.68055e-16	371	371
ADAM17	-0.417593	4.3412e-17	5.91556e-16	371	371
EEA1	-0.417581	4.35098e-17	5.92482e-16	371	371
FILIP1L	-0.417486	4.42953e-17	6.02766e-16	371	371
TSPYL1	-0.417436	4.47114e-17	6.08014e-16	371	371
C13orf31	-0.41731	4.57916e-17	6.21854e-16	371	371
WDR31	-0.4173	4.58822e-17	6.22661e-16	371	362
ZFYVE16	-0.417133	4.73475e-17	6.41671e-16	371	371
CAB39	-0.416574	5.26093e-17	7.10083e-16	371	371
AHNAK	-0.416463	5.37229e-17	7.24623e-16	371	371
KIF27	-0.416401	5.43453e-17	7.32522e-16	371	370
SPAG9	-0.416243	5.59936e-17	7.53719e-16	371	371
MAP2K1	-0.41607	5.78432e-17	7.77566e-16	371	371
PABPC4L	-0.415929	5.93907e-17	7.9783e-16	371	366
CYSLTR2	-0.415785	6.10272e-17	8.1871e-16	371	330
ZBTB10	-0.415706	6.19361e-17	8.2945e-16	371	371
MAPK6	-0.415705	6.19527e-17	8.2945e-16	371	371
ZBTB11	-0.415425	6.52948e-17	8.71268e-16	371	371
ONECUT1	-0.41506	6.99139e-17	9.29169e-16	371	367
TNRC6A	-0.414804	7.33417e-17	9.72779e-16	371	371
ZZZ3	-0.41468	7.50762e-17	9.9446e-16	371	371
GPR75	-0.414618	7.59445e-17	1.00529e-15	371	360
EAF1	-0.414482	7.79035e-17	1.02986e-15	371	371
JAK1	-0.414452	7.83457e-17	1.03502e-15	371	371
RAB8B	-0.414286	8.08062e-17	1.06681e-15	371	371
ARHGAP31	-0.414275	8.09821e-17	1.06843e-15	371	371
SMARCA5	-0.414159	8.27487e-17	1.09101e-15	371	371
LOC100271836	-0.414054	8.43947e-17	1.11198e-15	371	371
ITGA4	-0.413979	8.55763e-17	1.12606e-15	371	371
DBH	-0.41383	8.80013e-17	1.1572e-15	371	367
ZCCHC2	-0.413577	9.22442e-17	1.2114e-15	371	371
GAN	-0.413492	9.37116e-17	1.22824e-15	371	370
OIT3	-0.41324	9.82295e-17	1.28576e-15	371	370
GFM1	-0.413039	1.01965e-16	1.33378e-15	371	371
S1PR1	-0.412986	1.02974e-16	1.34521e-15	371	371
ZNF295	-0.412877	1.05093e-16	1.372e-15	371	371
ZNF828	-0.412811	1.06389e-16	1.388e-15	371	371
IQGAP2	-0.412738	1.07845e-16	1.40607e-15	371	371
MPDZ	-0.412614	1.10365e-16	1.4376e-15	371	371
PCDHGA11	-0.412612	1.10407e-16	1.4376e-15	371	327
UNC5C	-0.412517	1.12366e-16	1.46215e-15	371	308
SPIN1	-0.412456	1.13636e-16	1.47674e-15	371	371
SLC39A14	-0.412434	1.14119e-16	1.48206e-15	371	371
TAF1	-0.412409	1.1465e-16	1.48798e-15	371	371
ZMIZ1	-0.412313	1.16699e-16	1.51064e-15	371	371
NIPAL1	-0.41229	1.17202e-16	1.51616e-15	371	358
IL33	-0.412273	1.17576e-16	1.52002e-15	371	371
ZBTB44	-0.412224	1.18645e-16	1.53284e-15	371	371
SYNPO2	-0.412219	1.18754e-16	1.53326e-15	371	371
ASCC3	-0.412214	1.18873e-16	1.53381e-15	371	371
FYCO1	-0.412173	1.19779e-16	1.54448e-15	371	371
NCOA4	-0.412142	1.20465e-16	1.55233e-15	371	371
TRAF6	-0.412076	1.21961e-16	1.5706e-15	371	371
ZNF460	-0.411894	1.26138e-16	1.62124e-15	371	371
KBTBD4	-0.411774	1.28969e-16	1.65509e-15	371	371
CD93	-0.411772	1.29021e-16	1.65509e-15	371	371
ACADM	-0.41171	1.30522e-16	1.67327e-15	371	371
GPR17	-0.411695	1.30881e-16	1.67679e-15	371	332
THAP6	-0.411467	1.36508e-16	1.74776e-15	371	371
CYFIP1	-0.411349	1.39546e-16	1.77979e-15	371	371
ZNF619	-0.411253	1.42043e-16	1.80817e-15	371	371
KLF8	-0.41108	1.46659e-16	1.86455e-15	371	369
NOTCH2	-0.411052	1.47416e-16	1.87297e-15	371	371
EPB41L5	-0.411024	1.48169e-16	1.88134e-15	371	371
LOC220429	-0.410985	1.49241e-16	1.89237e-15	371	345
DCUN1D3	-0.410982	1.49322e-16	1.89237e-15	371	371
PAPOLG	-0.410967	1.49759e-16	1.8967e-15	371	371
LMTK2	-0.410882	1.52129e-16	1.92549e-15	371	371
CRYBG3	-0.41079	1.54737e-16	1.95601e-15	371	366
CLIP1	-0.410773	1.55208e-16	1.96072e-15	371	371
NID2	-0.410338	1.68182e-16	2.12193e-15	371	371
SPRY1	-0.410251	1.70894e-16	2.15478e-15	371	371
RAPGEF5	-0.410164	1.73688e-16	2.18863e-15	371	371
ERCC4	-0.409798	1.85787e-16	2.33665e-15	371	371
RHBDD1	-0.409717	1.88591e-16	2.37041e-15	371	371
SNTB2	-0.409665	1.90382e-16	2.38841e-15	371	371
BRWD3	-0.409536	1.94979e-16	2.44454e-15	371	370
C1orf58	-0.409531	1.95148e-16	2.44512e-15	371	371
DDX6	-0.409503	1.9614e-16	2.456e-15	371	371
RNF38	-0.409479	1.97024e-16	2.46552e-15	371	371
LOC100272216	-0.40937	2.01001e-16	2.51213e-15	371	333
PDP2	-0.409326	2.02649e-16	2.53115e-15	371	371
SAMHD1	-0.409285	2.04176e-16	2.54862e-15	371	371
CLINT1	-0.409177	2.08261e-16	2.59635e-15	371	371
C14orf135	-0.409117	2.10561e-16	2.62339e-15	371	371
KANK1	-0.409112	2.10749e-16	2.62409e-15	371	371
SEC22B	-0.409076	2.12156e-16	2.63995e-15	371	371
EPS8	-0.408981	2.15887e-16	2.68303e-15	371	371
AASDH	-0.408972	2.16239e-16	2.68573e-15	371	371
RBM7	-0.408906	2.18889e-16	2.71696e-15	371	371
ABHD13	-0.408855	2.20964e-16	2.73759e-15	371	371
ZSWIM6	-0.408805	2.22976e-16	2.75909e-15	371	371
SLC35A3	-0.408683	2.28032e-16	2.81863e-15	371	371
KIAA1671	-0.408682	2.28071e-16	2.81863e-15	371	371
CD164	-0.408649	2.29474e-16	2.83245e-15	371	371
ZMYM2	-0.408442	2.38334e-16	2.93817e-15	371	371
RASSF8	-0.408365	2.41733e-16	2.97824e-15	371	371
CBR4	-0.4083	2.44618e-16	3.01192e-15	371	371
CEP97	-0.407984	2.59197e-16	3.18748e-15	371	371
FRS2	-0.407874	2.64469e-16	3.25031e-15	371	371
SLC30A1	-0.407817	2.67239e-16	3.28031e-15	371	371
CREBBP	-0.407724	2.71794e-16	3.33006e-15	371	371
TMEM192	-0.407672	2.74383e-16	3.35899e-15	371	371
TOP1	-0.40767	2.74492e-16	3.35899e-15	371	371
ZNF644	-0.407637	2.76176e-16	3.37337e-15	371	371
SLC38A4	-0.407617	2.77199e-16	3.3838e-15	371	371
ZNF268	-0.407604	2.77831e-16	3.38944e-15	371	371
TXLNG	-0.407562	2.79963e-16	3.41336e-15	371	371
SLC24A1	-0.407475	2.84466e-16	3.46614e-15	371	371
KIAA0430	-0.407182	3.00108e-16	3.64781e-15	371	371
ATP6V1A	-0.407071	3.06245e-16	3.72013e-15	371	371
SDCCAG1	-0.407059	3.06888e-16	3.72567e-15	371	371
NAB1	-0.407056	3.07075e-16	3.72567e-15	371	371
SPEN	-0.406841	3.19341e-16	3.86273e-15	371	371
LEMD3	-0.40673	3.25873e-16	3.93219e-15	371	371
TRIM33	-0.406629	3.31925e-16	4.00119e-15	371	371
GIGYF2	-0.406628	3.31993e-16	4.00119e-15	371	371
MGC16384	-0.406546	3.36983e-16	4.05888e-15	371	295
DAAM1	-0.406245	3.55949e-16	4.27955e-15	371	371
FBXO11	-0.406165	3.61164e-16	4.33963e-15	371	371
ZNF827	-0.40609	3.66131e-16	4.39229e-15	371	328
PREPL	-0.406089	3.66208e-16	4.39229e-15	371	371
ZNF436	-0.405994	3.7262e-16	4.46651e-15	371	371
UBE2Q2P1	-0.405974	3.73974e-16	4.48004e-15	371	358
NFIC	-0.405929	3.77036e-16	4.51401e-15	371	371
LOC728323	-0.405894	3.79394e-16	4.53951e-15	371	361
MFSD8	-0.405844	3.82859e-16	4.57822e-15	371	371
ZNF800	-0.405792	3.86511e-16	4.61635e-15	371	371
FTSJD1	-0.405705	3.92656e-16	4.68694e-15	371	371
GOLGB1	-0.405669	3.95216e-16	4.71458e-15	371	371
PUM1	-0.405646	3.96905e-16	4.72915e-15	371	371
TTPA	-0.405538	4.0475e-16	4.81399e-15	371	367
SMAD9	-0.405224	4.28467e-16	5.08393e-15	371	317
CEP170	-0.404908	4.5372e-16	5.38036e-15	371	371
EGFR	-0.404748	4.67061e-16	5.52869e-15	371	371
TRIM2	-0.404696	4.71516e-16	5.57811e-15	371	371
LOC90586	-0.40455	4.84129e-16	5.72053e-15	371	367
CDK12	-0.404488	4.89567e-16	5.78136e-15	371	371
USP6NL	-0.404349	5.02006e-16	5.92474e-15	371	371
UHRF1BP1L	-0.404111	5.24056e-16	6.17035e-15	371	371
PARD3B	-0.40392	5.42462e-16	6.37577e-15	371	368
SNED1	-0.403794	5.54936e-16	6.5147e-15	371	371
RNF6	-0.403726	5.6177e-16	6.59104e-15	371	371
FLJ10213	-0.403667	5.67778e-16	6.65761e-15	371	339
MCC	-0.403611	5.73593e-16	6.72183e-15	371	371
RAPGEF4	-0.403592	5.75533e-16	6.74061e-15	371	371
DLC1	-0.403588	5.7598e-16	6.74187e-15	371	371
CCNG2	-0.403566	5.78263e-16	6.76463e-15	371	371
SNX1	-0.403553	5.7959e-16	6.77617e-15	371	371
OPA1	-0.403354	6.00822e-16	7.01616e-15	371	371
FRRS1	-0.403216	6.15838e-16	7.1831e-15	371	371
SLC5A3	-0.403093	6.29646e-16	7.33985e-15	371	371
WDR82	-0.402942	6.47049e-16	7.53831e-15	371	371
ZNF37A	-0.402851	6.57655e-16	7.65292e-15	371	371
SOS1	-0.402743	6.70555e-16	7.79393e-15	371	371
SF3B1	-0.402456	7.06139e-16	8.18365e-15	371	371
ZNF154	-0.40234	7.2096e-16	8.34515e-15	371	371
SMCHD1	-0.402337	7.21331e-16	8.34515e-15	371	371
ZBTB6	-0.402332	7.21949e-16	8.34746e-15	371	371
BTBD8	-0.402223	7.36318e-16	8.50373e-15	371	276
APPL1	-0.402176	7.42496e-16	8.56677e-15	371	371
NEK7	-0.402175	7.42637e-16	8.56677e-15	371	371
KDM5A	-0.402074	7.56147e-16	8.70749e-15	371	371
POLR2B	-0.402047	7.5982e-16	8.73968e-15	371	371
MUT	-0.402034	7.61681e-16	8.75604e-15	371	371
SNX25	-0.401815	7.92093e-16	9.08354e-15	371	371
SLAIN2	-0.401813	7.9245e-16	9.08354e-15	371	371
F2R	-0.401758	8.00298e-16	9.16822e-15	371	371
THRAP3	-0.401632	8.18513e-16	9.35001e-15	371	371
ZNF420	-0.401599	8.23363e-16	9.39463e-15	371	371
ADAMTSL3	-0.401533	8.33255e-16	9.50206e-15	371	371
SLC2A13	-0.401522	8.34799e-16	9.51423e-15	371	371
RGPD4	-0.401107	8.99189e-16	1.0213e-14	371	371
CAPN7	-0.400981	9.19754e-16	1.04407e-14	371	371
FERMT2	-0.400912	9.31161e-16	1.05521e-14	371	371
RANBP6	-0.400904	9.32462e-16	1.05608e-14	371	371
ZNF81	-0.400898	9.33349e-16	1.05649e-14	371	370
CHD2	-0.400862	9.39478e-16	1.06282e-14	371	371
SOCS5	-0.400834	9.44195e-16	1.06755e-14	371	371
AVPR1A	-0.400803	9.49486e-16	1.07232e-14	371	333
KLF10	-0.400735	9.60947e-16	1.08403e-14	371	371
ABCD3	-0.400716	9.64272e-16	1.08717e-14	371	371
ENTPD7	-0.400712	9.64913e-16	1.08727e-14	371	371
BRMS1L	-0.400588	9.8653e-16	1.11038e-14	371	371
ZNF280D	-0.400552	9.92937e-16	1.11696e-14	371	371
ZFR	-0.400503	1.00169e-15	1.12616e-14	371	371
LOC641298	-0.400463	1.0089e-15	1.13171e-14	371	341
BBX	-0.400338	1.03154e-15	1.15646e-14	371	371
RAB2B	-0.400303	1.03802e-15	1.16307e-14	371	371
RANBP2	-0.400041	1.08768e-15	1.21803e-14	371	371
WDR47	-0.399913	1.11276e-15	1.24541e-14	371	371
AKT3	-0.399849	1.12557e-15	1.25904e-14	371	371
C5orf36	-0.399827	1.12995e-15	1.26324e-14	371	368
PRDM2	-0.399715	1.15272e-15	1.28796e-14	371	371
ENTPD5	-0.399523	1.19269e-15	1.33039e-14	371	371
DAPK1	-0.399438	1.2109e-15	1.34768e-14	371	371
RABGAP1	-0.399099	1.28594e-15	1.42961e-14	371	371
FBN1	-0.398784	1.35995e-15	1.50936e-14	371	371
TRIM22	-0.398754	1.36734e-15	1.51671e-14	371	371
SCARB2	-0.398616	1.40108e-15	1.55327e-14	371	371
API5	-0.398552	1.4171e-15	1.56929e-14	371	371
PXK	-0.398495	1.4316e-15	1.58446e-14	371	371
LOC646214	-0.398445	1.44438e-15	1.59772e-14	371	371
BBS1	-0.398259	1.49254e-15	1.64916e-14	371	371
SORBS1	-0.398191	1.51079e-15	1.66761e-14	371	371
MLLT4	-0.39819	1.51091e-15	1.66761e-14	371	371
GPR125	-0.398141	1.5241e-15	1.6803e-14	371	371
ZXDA	-0.397988	1.56588e-15	1.72446e-14	371	369
ZCCHC14	-0.397811	1.61588e-15	1.77854e-14	371	371
ATP2A2	-0.397722	1.64128e-15	1.80359e-14	371	371
LYST	-0.397722	1.64135e-15	1.80359e-14	371	371
PDCD6IP	-0.397719	1.6423e-15	1.80363e-14	371	371
MAP3K13	-0.397627	1.66934e-15	1.83131e-14	371	369
ATP8B4	-0.397492	1.70956e-15	1.8744e-14	371	371
CCDC39	-0.397125	1.82382e-15	1.99748e-14	371	345
COL25A1	-0.397055	1.84669e-15	2.02141e-14	371	266
POLR2A	-0.396943	1.88352e-15	2.06059e-14	371	371
TRAM2	-0.396541	2.02169e-15	2.2057e-14	371	371
SPRY2	-0.396467	2.04831e-15	2.23352e-14	371	371
TLR6	-0.396415	2.06693e-15	2.25136e-14	371	360
SLTM	-0.39639	2.07608e-15	2.26009e-14	371	371
ZNF423	-0.396373	2.08221e-15	2.26553e-14	371	368
LIMA1	-0.396292	2.11227e-15	2.29573e-14	371	371
COX18	-0.396228	2.13622e-15	2.32049e-14	371	371
ZBTB26	-0.396139	2.16962e-15	2.35548e-14	371	371
CREBL2	-0.395797	2.30419e-15	2.49479e-14	371	371
CNTN4	-0.395735	2.32956e-15	2.52088e-14	371	366
RBM9	-0.395425	2.45953e-15	2.65432e-14	371	371
LNPEP	-0.395232	2.54442e-15	2.74445e-14	371	371
FBXO34	-0.39506	2.62233e-15	2.82696e-14	371	371
SFRS13A	-0.394895	2.69903e-15	2.90806e-14	371	371
VGLL3	-0.3948	2.74448e-15	2.95224e-14	371	370
SYTL2	-0.394703	2.79152e-15	2.99799e-14	371	371
MYST3	-0.394557	2.86374e-15	3.07058e-14	371	371
C12orf35	-0.394419	2.93348e-15	3.14197e-14	371	371
YTHDC1	-0.394396	2.94546e-15	3.15312e-14	371	371
ENTPD4	-0.394285	3.00298e-15	3.21296e-14	371	371
ZRANB1	-0.394269	3.01156e-15	3.22041e-14	371	371
COBLL1	-0.394141	3.07936e-15	3.29114e-14	371	371
DCAF12	-0.394125	3.08781e-15	3.29841e-14	371	371
ATXN1L	-0.394005	3.15326e-15	3.36291e-14	371	371
SOCS4	-0.393944	3.18738e-15	3.39749e-14	371	371
DNAJC27	-0.393884	3.22082e-15	3.43129e-14	371	371
CCDC82	-0.393828	3.25248e-15	3.46132e-14	371	371
BTAF1	-0.393565	3.40482e-15	3.61572e-14	371	371
RFX7	-0.393377	3.51866e-15	3.73161e-14	371	371
RLF	-0.393375	3.51957e-15	3.73161e-14	371	371
MED14	-0.393275	3.58115e-15	3.79487e-14	371	371
USP47	-0.393253	3.59511e-15	3.80562e-14	371	371
MAGI3	-0.393241	3.60293e-15	3.81187e-14	371	371
ZNF518A	-0.393156	3.65668e-15	3.86463e-14	371	371
VPS13A	-0.392915	3.81267e-15	4.0231e-14	371	371
KLHL5	-0.392768	3.9117e-15	4.12541e-14	371	371
WDR44	-0.392714	3.94834e-15	4.15964e-14	371	371
ZNF484	-0.392694	3.96257e-15	4.17243e-14	371	371
HIF1A	-0.392399	4.17033e-15	4.38655e-14	371	371
SRRM1	-0.392339	4.21411e-15	4.43027e-14	371	371
CDC42BPB	-0.392155	4.35108e-15	4.57185e-14	371	371
ATF7	-0.391993	4.4751e-15	4.6972e-14	371	371
USP16	-0.391825	4.60714e-15	4.82163e-14	371	371
UVRAG	-0.391824	4.60817e-15	4.82163e-14	371	371
CYP2U1	-0.391818	4.6128e-15	4.82395e-14	371	371
RBBP6	-0.391815	4.61542e-15	4.82415e-14	371	371
LRRFIP1	-0.391801	4.62663e-15	4.83333e-14	371	371
USP49	-0.391723	4.68947e-15	4.89385e-14	371	351
TRIO	-0.391705	4.70412e-15	4.90656e-14	371	371
GK3P	-0.391659	4.7419e-15	4.94187e-14	371	371
GNE	-0.391657	4.74293e-15	4.94187e-14	371	371
NPBWR1	-0.391599	4.79145e-15	4.98982e-14	371	195
FEM1C	-0.391507	4.86774e-15	5.06397e-14	371	371
IGF2R	-0.391444	4.92118e-15	5.11423e-14	371	371
STEAP4	-0.391413	4.94792e-15	5.13934e-14	371	370
L2HGDH	-0.391318	5.02967e-15	5.2188e-14	371	371
PDE12	-0.391261	5.08021e-15	5.2685e-14	371	371
CYP4V2	-0.391117	5.20829e-15	5.39571e-14	371	371
GTF3C4	-0.391092	5.23085e-15	5.41627e-14	371	371
CD226	-0.390935	5.37453e-15	5.56215e-14	371	357
KCTD20	-0.390733	5.56478e-15	5.75008e-14	371	371
NR3C2	-0.390546	5.74799e-15	5.93323e-14	371	371
RASGRF2	-0.390496	5.79734e-15	5.97798e-14	371	371
GJD3	-0.390382	5.91223e-15	6.09015e-14	371	371
USP33	-0.390347	5.9487e-15	6.12138e-14	371	371
NHLRC3	-0.389931	6.39013e-15	6.55869e-14	371	371
ZNF689	-0.389813	6.52092e-15	6.6826e-14	371	369
KIAA1161	-0.389786	6.55158e-15	6.71057e-14	371	371
ZFP36L1	-0.389537	6.8388e-15	6.9868e-14	371	371
CDK8	-0.389416	6.98235e-15	7.1298e-14	371	368
AZI2	-0.389333	7.08193e-15	7.22778e-14	371	371
FBXW7	-0.389322	7.0959e-15	7.23718e-14	371	371
ANKRD28	-0.38932	7.09841e-15	7.23718e-14	371	371
KIAA1217	-0.38927	7.15932e-15	7.29555e-14	371	371
C14orf118	-0.389204	7.2413e-15	7.37532e-14	371	371
AR	-0.389196	7.25108e-15	7.38151e-14	371	361
ARHGAP23	-0.389182	7.26912e-15	7.39231e-14	371	371
CPNE8	-0.388904	7.62313e-15	7.73259e-14	371	371
ADAMTS1	-0.388733	7.85047e-15	7.95914e-14	371	371
SETD2	-0.388648	7.96622e-15	8.07239e-14	371	371
STXBP3	-0.388458	8.23004e-15	8.33124e-14	371	371
CEP135	-0.38839	8.32537e-15	8.41919e-14	371	371
GPR174	-0.388345	8.39049e-15	8.48073e-14	371	284
PPP1CB	-0.388243	8.53747e-15	8.62492e-14	371	371
MGA	-0.388173	8.64116e-15	8.72083e-14	371	371
MPHOSPH8	-0.388094	8.75921e-15	8.83549e-14	371	371
KLHDC10	-0.38792	9.023e-15	9.09237e-14	371	371
SPTLC2	-0.387887	9.07391e-15	9.13905e-14	371	371
SLC40A1	-0.387867	9.10518e-15	9.16591e-14	371	371
SLC2A10	-0.38786	9.11669e-15	9.17286e-14	371	371
CD302	-0.387843	9.14273e-15	9.19443e-14	371	371
CTAGE1	-0.387564	9.5893e-15	9.62838e-14	371	362
C12orf51	-0.387447	9.78246e-15	9.813e-14	371	371
ALDH1L2	-0.387413	9.84038e-15	9.86613e-14	371	369
TGFBR1	-0.387243	1.01293e-14	1.01456e-13	371	371
LOC647979	-0.387226	1.01586e-14	1.01698e-13	371	371
AGL	-0.387111	1.03601e-14	1.03559e-13	371	371
FAM98B	-0.387023	1.05172e-14	1.05025e-13	371	371
RAB3GAP1	-0.387001	1.05567e-14	1.05366e-13	371	371
CAMK2D	-0.386764	1.09918e-14	1.09598e-13	371	371
DDX21	-0.386675	1.11595e-14	1.11215e-13	371	371
PAQR3	-0.386637	1.1231e-14	1.11872e-13	371	370
ALDH6A1	-0.386342	1.18092e-14	1.17455e-13	371	371
FBXO30	-0.386337	1.18203e-14	1.17472e-13	371	371
KIAA1712	-0.386256	1.19828e-14	1.18945e-13	371	371
AK3	-0.386161	1.2178e-14	1.20702e-13	371	371
CGGBP1	-0.386139	1.22234e-14	1.21091e-13	371	371
INTS6	-0.386051	1.24086e-14	1.22743e-13	371	371
ZNF175	-0.38596	1.26015e-14	1.24484e-13	371	370
DENND5B	-0.385959	1.26034e-14	1.24484e-13	371	371
DNAJC13	-0.385895	1.27407e-14	1.25716e-13	371	371
PARVA	-0.385868	1.28012e-14	1.2625e-13	371	371
USP46	-0.385685	1.32029e-14	1.30084e-13	371	371
KLHL2	-0.385676	1.32248e-14	1.30235e-13	371	371
CTBS	-0.385598	1.34007e-14	1.31902e-13	371	371
FAM45B	-0.385494	1.36381e-14	1.34106e-13	371	370
CSNK2A1P	-0.385421	1.38077e-14	1.35706e-13	371	371
JHDM1D	-0.385414	1.38254e-14	1.35814e-13	371	371
PRKD3	-0.385371	1.39271e-14	1.36745e-13	371	371
REV1	-0.385147	1.44652e-14	1.41889e-13	371	371
RASGEF1B	-0.384836	1.5246e-14	1.49254e-13	371	371
GRINL1A	-0.38479	1.53655e-14	1.50349e-13	371	371
LDLRAD3	-0.384739	1.54998e-14	1.51589e-13	371	366
SYNJ2BP	-0.384706	1.55854e-14	1.52352e-13	371	371
DOPEY1	-0.384642	1.57547e-14	1.53931e-13	371	371
ZNF441	-0.384629	1.57912e-14	1.54212e-13	371	371
UACA	-0.384606	1.58526e-14	1.54735e-13	371	371
SEC62	-0.384479	1.61959e-14	1.57932e-13	371	371
FAM160B1	-0.384386	1.64526e-14	1.60278e-13	371	371
PDE3B	-0.384346	1.6565e-14	1.61294e-13	371	371
SLCO1B1	-0.384337	1.65881e-14	1.6144e-13	371	369
ZBTB38	-0.384293	1.67118e-14	1.62485e-13	371	371
TAB3	-0.384231	1.68888e-14	1.64047e-13	371	371
ANKFY1	-0.384037	1.74503e-14	1.69252e-13	371	371
THBD	-0.383996	1.75721e-14	1.70351e-13	371	371
USP32	-0.383985	1.76045e-14	1.70582e-13	371	371
KDM6A	-0.383945	1.77229e-14	1.71563e-13	371	371
CTTNBP2NL	-0.383896	1.78715e-14	1.72833e-13	371	371
CASP8AP2	-0.383743	1.83366e-14	1.77073e-13	371	371
AP4E1	-0.383659	1.86009e-14	1.79315e-13	371	371
MYOF	-0.383657	1.86047e-14	1.79315e-13	371	371
HIP1	-0.383594	1.8805e-14	1.81157e-13	371	371
ZNF397	-0.38355	1.89448e-14	1.82415e-13	371	371
PPIL4	-0.383506	1.90836e-14	1.83664e-13	371	371
IL18R1	-0.383355	1.95761e-14	1.8813e-13	371	370
C6orf72	-0.383351	1.95887e-14	1.88161e-13	371	371
PPP1R3B	-0.383299	1.97615e-14	1.89729e-13	371	371
SNX13	-0.383296	1.9773e-14	1.89748e-13	371	371
CYYR1	-0.383149	2.02687e-14	1.94318e-13	371	371
WNK1	-0.382837	2.13571e-14	2.04457e-13	371	371
SPOPL	-0.382654	2.20249e-14	2.10749e-13	371	371
PTPRC	-0.382598	2.22325e-14	2.12634e-13	371	371
SEPSECS	-0.382563	2.23634e-14	2.13783e-13	371	371
SNX6	-0.382435	2.28518e-14	2.18347e-13	371	371
RORA	-0.382431	2.28667e-14	2.18384e-13	371	371
SGMS1	-0.382163	2.39162e-14	2.28088e-13	371	371
EDNRB	-0.382148	2.39771e-14	2.28551e-13	371	371
VEZT	-0.382048	2.43844e-14	2.321e-13	371	371
PTPRK	-0.382032	2.44483e-14	2.32487e-13	371	371
CCR4	-0.382021	2.44944e-14	2.32814e-13	371	314
OSMR	-0.382009	2.4541e-14	2.33145e-13	371	371
ENPEP	-0.381989	2.46241e-14	2.33712e-13	371	371
GLUD2	-0.381749	2.56333e-14	2.43059e-13	371	371
PAPD4	-0.381743	2.5661e-14	2.43205e-13	371	371
NUPL1	-0.381534	2.65751e-14	2.5151e-13	371	371
PBRM1	-0.381319	2.75467e-14	2.60211e-13	371	371
TRAPPC10	-0.381196	2.81178e-14	2.65103e-13	371	371
RPRD1B	-0.381002	2.9046e-14	2.73595e-13	371	371
ATP11A	-0.380735	3.03711e-14	2.85836e-13	371	371
CLDN16	-0.380734	3.03742e-14	2.85836e-13	371	332
RBM27	-0.380395	3.21434e-14	3.02057e-13	371	371
ZNF236	-0.380157	3.34408e-14	3.13953e-13	371	371
SYNJ2	-0.380082	3.38619e-14	3.17607e-13	371	371
P2RX7	-0.380058	3.39939e-14	3.18695e-13	371	370
THSD7A	-0.380002	3.43164e-14	3.21567e-13	371	369
CMTM1	-0.379958	3.45652e-14	3.23746e-13	371	371
ADRA1A	-0.379852	3.51817e-14	3.29211e-13	371	349
IKZF5	-0.379777	3.56227e-14	3.33025e-13	371	371
PVRL3	-0.379701	3.60775e-14	3.3696e-13	371	366
MED1	-0.379693	3.61272e-14	3.37266e-13	371	371
MFHAS1	-0.379561	3.69286e-14	3.44425e-13	371	371
MLL	-0.379373	3.80952e-14	3.54973e-13	371	371
YPEL2	-0.379357	3.81982e-14	3.55766e-13	371	371
COL8A1	-0.379311	3.84919e-14	3.58335e-13	371	365
PDS5A	-0.37928	3.86893e-14	3.59873e-13	371	371
RMND5A	-0.379053	4.01754e-14	3.73309e-13	371	371
RHOJ	-0.379003	4.05104e-14	3.76071e-13	371	371
UPF2	-0.378933	4.09842e-14	3.80115e-13	371	371
SGK196	-0.378726	4.24111e-14	3.93166e-13	371	346
MLL2	-0.378401	4.4758e-14	4.1396e-13	371	371
MAML3	-0.378324	4.53319e-14	4.18684e-13	371	371
SHOC2	-0.378275	4.57044e-14	4.2193e-13	371	371
NR1D2	-0.378077	4.7223e-14	4.35545e-13	371	371
SPTY2D1	-0.378016	4.76985e-14	4.39524e-13	371	371
TAOK3	-0.377953	4.81997e-14	4.43936e-13	371	371
SENP6	-0.377872	4.885e-14	4.49576e-13	371	371
SWAP70	-0.377863	4.89207e-14	4.49953e-13	371	371
ZNF417	-0.377698	5.02733e-14	4.61754e-13	371	371
ATP11C	-0.377677	5.04525e-14	4.63187e-13	371	371
YLPM1	-0.377578	5.12837e-14	4.70384e-13	371	371
HSPG2	-0.377435	5.25062e-14	4.81376e-13	371	371
ACSL1	-0.377083	5.56383e-14	5.08426e-13	371	371
PLEKHA7	-0.377081	5.5661e-14	5.08426e-13	371	371
YME1L1	-0.37666	5.96556e-14	5.44415e-13	371	371
STK38L	-0.376623	6.00236e-14	5.47523e-13	371	371
INHBA	-0.376548	6.07683e-14	5.54063e-13	371	369
WRN	-0.376524	6.10095e-14	5.56007e-13	371	371
PLEKHA1	-0.3765	6.12481e-14	5.57926e-13	371	371
TWSG1	-0.376471	6.15393e-14	5.60323e-13	371	371
RASA1	-0.376454	6.17073e-14	5.61596e-13	371	371
FAT1	-0.375951	6.7031e-14	6.08934e-13	371	371
CAT	-0.375821	6.84782e-14	6.21231e-13	371	371
TBC1D5	-0.37531	7.44548e-14	6.73304e-13	371	371
COL4A1	-0.375174	7.61369e-14	6.87891e-13	371	371
CYBRD1	-0.375065	7.75022e-14	6.99909e-13	371	371
SPCS3	-0.374939	7.91099e-14	7.14104e-13	371	371
DENND5A	-0.374862	8.01119e-14	7.22821e-13	371	371
NAT1	-0.374829	8.05461e-14	7.2641e-13	371	370
NRBF2	-0.374803	8.08984e-14	7.29257e-13	371	371
DHX36	-0.374776	8.12482e-14	7.32079e-13	371	371
ZNF180	-0.374574	8.39735e-14	7.56293e-13	371	371
DIS3L	-0.374528	8.4614e-14	7.60343e-13	371	371
ALG10B	-0.374512	8.48308e-14	7.61947e-13	371	371
EPHA4	-0.374158	8.9873e-14	8.06873e-13	371	370
KIAA0240	-0.374067	9.12197e-14	8.18594e-13	371	371
SLFN12L	-0.374029	9.17958e-14	8.23022e-13	371	316
UGT2A3	-0.373992	9.235e-14	8.27619e-13	371	367
NPHP3	-0.373623	9.80619e-14	8.76836e-13	371	371
KAT2B	-0.373304	1.03287e-13	9.21493e-13	371	371
GSTCD	-0.373179	1.05415e-13	9.39214e-13	371	371
MBLAC2	-0.373149	1.0593e-13	9.43327e-13	371	370
GPATCH8	-0.373088	1.06983e-13	9.51481e-13	371	371
KLF7	-0.373072	1.07262e-13	9.5354e-13	371	361
SLC5A4	-0.373018	1.08201e-13	9.61027e-13	371	289
RICTOR	-0.372991	1.08692e-13	9.6453e-13	371	371
CCDC144B	-0.372947	1.09468e-13	9.70547e-13	371	285
SLFN11	-0.372812	1.11895e-13	9.91188e-13	371	371
PI4K2B	-0.372718	1.1361e-13	1.00459e-12	371	371
RAD23B	-0.372689	1.14139e-13	1.00882e-12	371	371
INTS2	-0.372617	1.15481e-13	1.02023e-12	371	371
SLC25A40	-0.37257	1.16378e-13	1.0277e-12	371	371
OXR1	-0.372515	1.17412e-13	1.0359e-12	371	371
SLC38A7	-0.372468	1.18312e-13	1.04339e-12	371	371
PHF3	-0.372456	1.18554e-13	1.04506e-12	371	371
CBL	-0.372452	1.18623e-13	1.0452e-12	371	371
FAM13B	-0.372421	1.19213e-13	1.04948e-12	371	371
BPTF	-0.372215	1.23261e-13	1.08368e-12	371	371
DCK	-0.372145	1.24682e-13	1.09568e-12	371	371
SFRS11	-0.372117	1.25248e-13	1.10017e-12	371	371
TMOD2	-0.372094	1.25703e-13	1.10368e-12	371	371
RBMS3	-0.372088	1.25831e-13	1.10432e-12	371	359
XIAP	-0.37206	1.26404e-13	1.10886e-12	371	371
UBR2	-0.372009	1.27451e-13	1.11706e-12	371	371
RYBP	-0.371907	1.29581e-13	1.13473e-12	371	371
NOTCH4	-0.371857	1.3063e-13	1.14292e-12	371	371
ZNF25	-0.371684	1.34327e-13	1.17457e-12	371	371
ZNF224	-0.371557	1.37112e-13	1.197e-12	371	371
NRP1	-0.371541	1.37471e-13	1.1996e-12	371	371
ZNF616	-0.371438	1.39775e-13	1.21917e-12	371	371
TSHZ3	-0.37143	1.3997e-13	1.21981e-12	371	371
PNPLA8	-0.371361	1.4153e-13	1.23287e-12	371	371
ABCA9	-0.371225	1.44679e-13	1.25975e-12	371	370
HACE1	-0.371218	1.44835e-13	1.26055e-12	371	370
SORBS2	-0.371126	1.47011e-13	1.27893e-12	371	371
INO80D	-0.371012	1.49746e-13	1.30215e-12	371	371
FKTN	-0.371005	1.49904e-13	1.3024e-12	371	371
SH3BP5	-0.370976	1.50604e-13	1.30791e-12	371	371
LRCH3	-0.370778	1.55493e-13	1.34801e-12	371	371
SGCB	-0.370758	1.56001e-13	1.35182e-12	371	371
PRKCH	-0.370488	1.62946e-13	1.40895e-12	371	371
C9orf80	-0.370411	1.64953e-13	1.42568e-12	371	371
MED23	-0.370135	1.72448e-13	1.48788e-12	371	371
GAPVD1	-0.369746	1.83584e-13	1.58122e-12	371	371
MGAT2	-0.369661	1.86097e-13	1.60217e-12	371	371
AKAP9	-0.369608	1.87715e-13	1.6154e-12	371	371
ACADSB	-0.36959	1.88238e-13	1.6185e-12	371	371
TMEM150C	-0.369524	1.90247e-13	1.63437e-12	371	370
LMO7	-0.369489	1.91333e-13	1.64157e-12	371	371
NKTR	-0.369451	1.92489e-13	1.65078e-12	371	371
COL4A4	-0.369378	1.94775e-13	1.66823e-12	371	371
MMRN2	-0.369211	2.00059e-13	1.71128e-12	371	371
ZNF217	-0.369204	2.00281e-13	1.71245e-12	371	371
ZNF521	-0.369166	2.01497e-13	1.72211e-12	371	371
HSPA13	-0.369158	2.01761e-13	1.72362e-12	371	371
ARID2	-0.369114	2.0317e-13	1.73492e-12	371	371
TMTC3	-0.369097	2.0373e-13	1.73895e-12	371	371
ABCC9	-0.369084	2.04177e-13	1.74202e-12	371	371
MFSD9	-0.369059	2.04981e-13	1.74739e-12	371	371
FAM188A	-0.369048	2.05343e-13	1.74972e-12	371	371
FOXO3	-0.368778	2.14436e-13	1.82642e-12	371	371
VPRBP	-0.368733	2.15956e-13	1.83858e-12	371	371
PRRG4	-0.368677	2.17933e-13	1.85304e-12	371	371
KIAA0586	-0.368667	2.18252e-13	1.85416e-12	371	371
FAM161B	-0.368637	2.19309e-13	1.86235e-12	371	365
RBM25	-0.368603	2.20505e-13	1.87171e-12	371	371
PDE7B	-0.368592	2.20896e-13	1.87423e-12	371	371
PTPN3	-0.368147	2.37189e-13	2.00649e-12	371	371
RECQL	-0.367983	2.43485e-13	2.05713e-12	371	371
2022-03-07	-0.367905	2.46519e-13	2.08188e-12	371	371
CCDC75	-0.367874	2.47775e-13	2.09072e-12	371	370
YES1	-0.367509	2.62599e-13	2.21392e-12	371	371
KIAA1715	-0.367437	2.65655e-13	2.23874e-12	371	371
MCFD2	-0.367357	2.69041e-13	2.26536e-12	371	371
RUNDC2A	-0.36721	2.75437e-13	2.31628e-12	371	357
RGS18	-0.367172	2.77074e-13	2.32808e-12	371	364
MEX3C	-0.367109	2.79909e-13	2.35091e-12	371	371
GAS2L3	-0.366776	2.95105e-13	2.4754e-12	371	349
BCKDHB	-0.366531	3.06831e-13	2.57052e-12	371	371
RPS6KA5	-0.366381	3.14219e-13	2.6302e-12	371	369
FTO	-0.366322	3.17169e-13	2.65377e-12	371	371
DMD	-0.36623	3.2186e-13	2.6919e-12	371	371
PARP11	-0.366194	3.23691e-13	2.70607e-12	371	371
SRRM2	-0.366137	3.26624e-13	2.72945e-12	371	371
SULT1C4	-0.366134	3.26806e-13	2.72982e-12	371	354
DIP2C	-0.366111	3.27985e-13	2.73852e-12	371	371
IGFBP5	-0.366066	3.3034e-13	2.75703e-12	371	371
PELI1	-0.366042	3.31586e-13	2.76627e-12	371	371
ZC3H7A	-0.366038	3.31789e-13	2.76681e-12	371	371
FAM107B	-0.365767	3.46358e-13	2.88468e-12	371	371
LRRC37A4	-0.365738	3.47961e-13	2.8956e-12	371	371
LRRC8A	-0.365686	3.50826e-13	2.91701e-12	371	371
ABAT	-0.365562	3.57816e-13	2.97265e-12	371	371
PDPK1	-0.365424	3.65684e-13	3.03617e-12	371	371
SATB1	-0.365355	3.6973e-13	3.06779e-12	371	371
TMX3	-0.365301	3.72868e-13	3.09125e-12	371	371
C6orf155	-0.365234	3.76889e-13	3.12329e-12	371	337
DTWD2	-0.365226	3.7733e-13	3.12564e-12	371	371
CAND1	-0.365159	3.81384e-13	3.1566e-12	371	371
GXYLT1	-0.365104	3.84667e-13	3.18245e-12	371	371
SNAP23	-0.364992	3.91573e-13	3.23689e-12	371	371
APOB	-0.364874	3.98963e-13	3.29525e-12	371	371
CRK	-0.364858	3.9993e-13	3.30187e-12	371	371
PCSK5	-0.364841	4.01051e-13	3.30975e-12	371	371
LUZP1	-0.364821	4.02307e-13	3.31874e-12	371	371
ZFHX3	-0.364813	4.02797e-13	3.32141e-12	371	371
RC3H1	-0.364741	4.07395e-13	3.35793e-12	371	371
STAG2	-0.364621	4.15224e-13	3.41963e-12	371	371
C14orf49	-0.364557	4.19393e-13	3.44969e-12	371	371
MEF2C	-0.364525	4.21552e-13	3.46602e-12	371	371
RAB5A	-0.364233	4.41417e-13	3.62526e-12	371	371
GDF7	-0.364232	4.41466e-13	3.62526e-12	371	313
COL4A3	-0.364192	4.44275e-13	3.64683e-12	371	345
KCTD9	-0.36418	4.45067e-13	3.65182e-12	371	371
TMEM131	-0.364123	4.49112e-13	3.6835e-12	371	371
ZSCAN23	-0.364002	4.57778e-13	3.75148e-12	371	222
FICD	-0.363939	4.62349e-13	3.78739e-12	371	371
LRRK2	-0.363889	4.65978e-13	3.81555e-12	371	370
DIP2B	-0.363874	4.67073e-13	3.82294e-12	371	371
MYCT1	-0.363741	4.76949e-13	3.89896e-12	371	371
FOXO1	-0.36348	4.9697e-13	4.05764e-12	371	371
RRAGC	-0.363392	5.03825e-13	4.11192e-12	371	370
MAPK1	-0.363222	5.17453e-13	4.22142e-12	371	371
DYNLL2	-0.363151	5.23328e-13	4.2676e-12	371	371
HMCN1	-0.363099	5.27616e-13	4.29904e-12	371	370
C9orf64	-0.363083	5.2892e-13	4.30614e-12	371	371
CASQ2	-0.363072	5.29849e-13	4.31195e-12	371	362
EYA3	-0.362792	5.53625e-13	4.50176e-12	371	371
KDELC2	-0.362709	5.60838e-13	4.55669e-12	371	371
TTC14	-0.362685	5.6302e-13	4.57256e-12	371	371
STARD8	-0.362454	5.83733e-13	4.73692e-12	371	371
ARIH1	-0.362417	5.87139e-13	4.76068e-12	371	371
WWTR1	-0.362309	5.97101e-13	4.83555e-12	371	371
HOOK1	-0.362179	6.09418e-13	4.92729e-12	371	371
PDS5B	-0.362133	6.13847e-13	4.96108e-12	371	371
EIF4G2	-0.361956	6.31076e-13	5.09619e-12	371	371
STARD13	-0.36193	6.33622e-13	5.10995e-12	371	371
LPP	-0.361928	6.33806e-13	5.10995e-12	371	371
ZCCHC11	-0.361834	6.43213e-13	5.18369e-12	371	371
NBPF14	-0.36181	6.45576e-13	5.20063e-12	371	371
TRIM5	-0.361761	6.5058e-13	5.23883e-12	371	371
LIN52	-0.361684	6.58421e-13	5.29982e-12	371	371
UTRN	-0.361673	6.59573e-13	5.30695e-12	371	371
TMEM170A	-0.361644	6.62622e-13	5.32933e-12	371	371
RCBTB1	-0.361602	6.66956e-13	5.35554e-12	371	371
INO80	-0.361509	6.7674e-13	5.42536e-12	371	371
FRMD6	-0.361505	6.77104e-13	5.4261e-12	371	371
NHEDC2	-0.361464	6.81428e-13	5.45635e-12	371	371
YY1	-0.361455	6.82446e-13	5.46231e-12	371	371
DLG1	-0.36138	6.90399e-13	5.52375e-12	371	371
GNPTAB	-0.36131	6.97984e-13	5.57995e-12	371	371
IL1RAP	-0.361096	7.21671e-13	5.76007e-12	371	371
KIAA0664P3	-0.361092	7.22175e-13	5.76178e-12	371	370
CDC14B	-0.361071	7.24512e-13	5.7758e-12	371	371
NRP2	-0.361067	7.24959e-13	5.77705e-12	371	371
DOCK10	-0.360867	7.47987e-13	5.95525e-12	371	371
DNAJB4	-0.360865	7.48217e-13	5.95525e-12	371	371
TRIM56	-0.360832	7.52066e-13	5.9811e-12	371	371
LRRC2	-0.360702	7.67355e-13	6.10025e-12	371	370
FMO2	-0.360692	7.68558e-13	6.10738e-12	371	369
DMXL2	-0.360657	7.72758e-13	6.13586e-12	371	371
SLC30A7	-0.360615	7.77859e-13	6.17145e-12	371	371
PBLD	-0.360561	7.84453e-13	6.22129e-12	371	371
INPP4A	-0.36036	8.09343e-13	6.40339e-12	371	371
GUCY1A3	-0.360286	8.1871e-13	6.47493e-12	371	371
CDC40	-0.360209	8.28589e-13	6.55046e-12	371	371
SGK1	-0.360088	8.44302e-13	6.66938e-12	371	371
CHD1	-0.360081	8.45144e-13	6.67339e-12	371	371
SP1	-0.360048	8.49592e-13	6.7032e-12	371	371
SNIP1	-0.359729	8.92743e-13	7.03529e-12	371	371
APPBP2	-0.35972	8.93991e-13	7.04234e-12	371	371
SCP2	-0.359691	8.98025e-13	7.06854e-12	371	371
FUT11	-0.359642	9.04798e-13	7.11903e-12	371	371
CSNK1G3	-0.359578	9.13835e-13	7.1873e-12	371	371
KPNA1	-0.359564	9.15776e-13	7.19972e-12	371	371
PER3	-0.359525	9.21419e-13	7.24123e-12	371	371
APOLD1	-0.359502	9.24622e-13	7.26354e-12	371	371
MCCC2	-0.359178	9.72271e-13	7.63183e-12	371	371
DOCK4	-0.359006	9.98555e-13	7.83197e-12	371	371
ZNF621	-0.358959	1.00586e-12	7.8862e-12	371	371
ATP7B	-0.358909	1.01356e-12	7.94339e-12	371	371
SEC23IP	-0.358869	1.01986e-12	7.98963e-12	371	371
ANGPTL1	-0.35876	1.03717e-12	8.11883e-12	371	371
C1orf192	-0.358678	1.05046e-12	8.21969e-12	371	362
LOC729603	-0.358603	1.06267e-12	8.3087e-12	371	371
PCMTD2	-0.358544	1.07237e-12	8.38124e-12	371	371
GPR173	-0.358527	1.07527e-12	8.40061e-12	371	281
FGD6	-0.358507	1.07861e-12	8.42342e-12	371	371
RSRC1	-0.358474	1.08407e-12	8.46271e-12	371	371
CLEC1A	-0.358375	1.1008e-12	8.58997e-12	371	370
OXSR1	-0.358178	1.13478e-12	8.84821e-12	371	371
NPTN	-0.357922	1.18048e-12	9.19729e-12	371	371
LOC729799	-0.357823	1.19871e-12	9.32477e-12	371	345
MRPL19	-0.357818	1.19955e-12	9.32765e-12	371	371
TUBGCP4	-0.35772	1.21783e-12	9.46613e-12	371	371
PRKACB	-0.357467	1.26627e-12	9.83113e-12	371	371
ZMYM4	-0.357166	1.32617e-12	1.02881e-11	371	371
NDFIP2	-0.357154	1.32876e-12	1.03042e-11	371	371
TRIM78P	-0.357058	1.34832e-12	1.04397e-11	371	331
APBB2	-0.356814	1.39983e-12	1.08342e-11	371	371
ALS2	-0.356715	1.42141e-12	1.0997e-11	371	371
LOC283856	-0.356471	1.47554e-12	1.13981e-11	371	204
RGL1	-0.356467	1.47642e-12	1.14005e-11	371	371
HINT3	-0.356384	1.49534e-12	1.15376e-11	371	371
BHLHE40	-0.3563	1.51469e-12	1.16824e-11	371	371
SCARF1	-0.35625	1.52655e-12	1.17694e-11	371	371
SESN3	-0.35585	1.62295e-12	1.24836e-11	371	368
PRDM10	-0.355836	1.62646e-12	1.25057e-11	371	371
RBM26	-0.355812	1.6323e-12	1.25458e-11	371	371
KCNA3	-0.355806	1.63394e-12	1.25535e-11	371	342
FAM76B	-0.355743	1.64978e-12	1.26703e-11	371	371
DNAJC22	-0.355572	1.69339e-12	1.29953e-11	371	371
LOC100132707	-0.355479	1.71772e-12	1.31718e-11	371	371
PLS1	-0.355464	1.72152e-12	1.31959e-11	371	370
GOLGA5	-0.355253	1.77804e-12	1.36037e-11	371	371
FOXN3	-0.355243	1.78062e-12	1.36174e-11	371	371
WAPAL	-0.355143	1.80816e-12	1.38122e-11	371	371
PCDH18	-0.355005	1.84653e-12	1.40945e-11	371	370
PARP9	-0.354831	1.89613e-12	1.44675e-11	371	371
SYDE2	-0.354712	1.93108e-12	1.47173e-11	371	367
TMEM106B	-0.354704	1.93339e-12	1.47292e-11	371	371
C1orf55	-0.354674	1.94224e-12	1.47834e-11	371	371
RRN3	-0.354672	1.94273e-12	1.47834e-11	371	371
IPO8	-0.354659	1.94666e-12	1.48077e-11	371	371
RGS5	-0.354473	2.00269e-12	1.52223e-11	371	371
FN1	-0.354431	2.01534e-12	1.53068e-11	371	371
ABO	-0.354357	2.03834e-12	1.54755e-11	371	227
WNK3	-0.354351	2.04023e-12	1.5484e-11	371	365
GALNT4	-0.354294	2.05776e-12	1.56111e-11	371	371
HFE	-0.354282	2.06161e-12	1.56344e-11	371	371
GOLGA6L5	-0.354239	2.07516e-12	1.57311e-11	371	366
GIMAP8	-0.354068	2.12979e-12	1.6133e-11	371	371
ABL1	-0.354065	2.13094e-12	1.61356e-11	371	371
MYH10	-0.353978	2.1592e-12	1.63371e-11	371	371
EPHA3	-0.353928	2.17561e-12	1.6455e-11	371	369
BARD1	-0.353855	2.20009e-12	1.66276e-11	371	347
FLT4	-0.353812	2.21458e-12	1.67307e-11	371	371
TSPYL3	-0.353638	2.27381e-12	1.71522e-11	371	294
SDAD1	-0.35363	2.27649e-12	1.71659e-11	371	371
BTBD7	-0.353408	2.35457e-12	1.77412e-11	371	371
CRIM1	-0.3534	2.35727e-12	1.77548e-11	371	371
GPR20	-0.353396	2.35865e-12	1.77585e-11	371	251
STON1	-0.353363	2.37079e-12	1.78364e-11	371	371
USPL1	-0.353244	2.41388e-12	1.81469e-11	371	371
ZAK	-0.353071	2.4781e-12	1.86086e-11	371	371
RASGRP3	-0.35283	2.57017e-12	1.92782e-11	371	371
ATXN1	-0.352689	2.6257e-12	1.96725e-11	371	371
TRANK1	-0.352662	2.63617e-12	1.97436e-11	371	371
PCDHGA6	-0.352594	2.66381e-12	1.9943e-11	371	336
CD84	-0.352425	2.73271e-12	2.04435e-11	371	370
AFTPH	-0.352331	2.77163e-12	2.07269e-11	371	371
TNKS	-0.352323	2.7749e-12	2.07436e-11	371	371
CD200	-0.352314	2.77879e-12	2.07648e-11	371	371
SLC25A46	-0.352306	2.78223e-12	2.07827e-11	371	371
TMEM154	-0.352156	2.84617e-12	2.12444e-11	371	365
MTMR12	-0.352095	2.8723e-12	2.14314e-11	371	371
PPP1R16B	-0.352063	2.88643e-12	2.15288e-11	371	371
THRB	-0.352052	2.89119e-12	2.15562e-11	371	371
CAPS2	-0.351918	2.95e-12	2.19865e-11	371	361
KCTD12	-0.3519	2.95818e-12	2.20392e-11	371	371
SPRY3	-0.351787	3.00878e-12	2.24055e-11	371	371
GUCY1A2	-0.351786	3.0096e-12	2.24055e-11	371	367
USP15	-0.351742	3.02944e-12	2.25343e-11	371	371
SUCLA2	-0.35174	3.03029e-12	2.25343e-11	371	371
PAR5	-0.351713	3.04258e-12	2.26173e-11	371	302
HP1BP3	-0.351655	3.0697e-12	2.28019e-11	371	371
ARID1A	-0.351601	3.09445e-12	2.29771e-11	371	371
SFRS12	-0.351529	3.12834e-12	2.32115e-11	371	371
ZMAT3	-0.351426	3.17731e-12	2.3566e-11	371	371
GIMAP7	-0.351386	3.19636e-12	2.36985e-11	371	371
SNX12	-0.351269	3.25331e-12	2.40939e-11	371	371
PPM1L	-0.351221	3.27694e-12	2.42598e-11	371	371
NR4A2	-0.351189	3.29277e-12	2.4368e-11	371	371
DOCK8	-0.35104	3.36754e-12	2.49028e-11	371	371
ZFHX4	-0.350783	3.50038e-12	2.58467e-11	371	371
TMED5	-0.350685	3.55203e-12	2.6199e-11	371	371
PPARA	-0.350681	3.55422e-12	2.62055e-11	371	371
TTC7B	-0.350577	3.61031e-12	2.66092e-11	371	371
FAM196B	-0.350505	3.64962e-12	2.68889e-11	371	144
MIER3	-0.350432	3.68948e-12	2.71725e-11	371	371
ZNF660	-0.350357	3.73151e-12	2.74719e-11	371	287
RNF144B	-0.350336	3.74315e-12	2.75223e-11	371	371
PHACTR4	-0.350314	3.75591e-12	2.76006e-11	371	371
FAM120B	-0.350244	3.79536e-12	2.78597e-11	371	371
P2RY12	-0.350191	3.82579e-12	2.80727e-11	371	312
FKBP14	-0.350112	3.87127e-12	2.83855e-11	371	371
APOL6	-0.350052	3.90632e-12	2.86311e-11	371	371
PAN3	-0.350039	3.91402e-12	2.86568e-11	371	371
MAP3K3	-0.349879	4.00859e-12	2.93275e-11	371	371
ZC3H12C	-0.349839	4.03291e-12	2.94731e-11	371	371
FOXN2	-0.349803	4.05467e-12	2.96213e-11	371	371
LRRC8C	-0.349788	4.06388e-12	2.96776e-11	371	371
ST6GALNAC3	-0.349773	4.07298e-12	2.97332e-11	371	371
NNT	-0.34977	4.07491e-12	2.97364e-11	371	371
F8	-0.349721	4.10508e-12	2.99326e-11	371	371
KTN1	-0.349719	4.10631e-12	2.99326e-11	371	371
HS3ST3A1	-0.349392	4.31191e-12	3.13854e-11	371	370
STX12	-0.34926	4.39823e-12	3.19787e-11	371	371
LIMD1	-0.349234	4.41487e-12	3.20879e-11	371	371
ZNF292	-0.348987	4.58119e-12	3.32483e-11	371	371
RB1	-0.348928	4.62211e-12	3.35168e-11	371	371
IQGAP1	-0.348926	4.62324e-12	3.35168e-11	371	371
EHD3	-0.348795	4.71462e-12	3.4142e-11	371	371
SLC7A2	-0.348743	4.75133e-12	3.43953e-11	371	371
ALAD	-0.348697	4.78375e-12	3.46175e-11	371	371
CCDC85A	-0.348647	4.82004e-12	3.48547e-11	371	369
RPL23AP53	-0.348582	4.86699e-12	3.51815e-11	371	371
TMEM56	-0.348545	4.89387e-12	3.5363e-11	371	371
ANGPT1	-0.348463	4.95369e-12	3.57823e-11	371	366
SIRPB2	-0.348358	5.03211e-12	3.63355e-11	371	362
RBBP5	-0.348041	5.27518e-12	3.80217e-11	371	371
CTSO	-0.348021	5.29102e-12	3.81221e-11	371	371
YY2	-0.347802	5.46598e-12	3.93685e-11	371	346
RCOR1	-0.347763	5.49809e-12	3.95712e-11	371	371
MAMDC2	-0.347752	5.50697e-12	3.96207e-11	371	351
IKZF4	-0.347647	5.59354e-12	4.02146e-11	371	371
ATP10D	-0.347473	5.74008e-12	4.12384e-11	371	371
SUCLG2	-0.347458	5.75289e-12	4.13154e-11	371	371
2022-09-02	-0.347439	5.76982e-12	4.14221e-11	371	371
RASAL2	-0.346853	6.29362e-12	4.515e-11	371	371
IBTK	-0.346757	6.38401e-12	4.57655e-11	371	371
PCDHGA5	-0.346708	6.43013e-12	4.60795e-11	371	336
ZNF678	-0.346577	6.55676e-12	4.69532e-11	371	369
AFF4	-0.346495	6.6362e-12	4.7505e-11	371	371
RAB30	-0.346481	6.64986e-12	4.75857e-11	371	371
RNF13	-0.346364	6.76691e-12	4.84059e-11	371	371
RAPGEF1	-0.346307	6.82358e-12	4.87938e-11	371	371
UBA3	-0.346279	6.85163e-12	4.89768e-11	371	371
LOC440354	-0.346271	6.86072e-12	4.90241e-11	371	370
SALL1	-0.346062	7.07582e-12	5.05249e-11	371	370
C2orf69	-0.346034	7.10456e-12	5.06938e-11	371	371
ZNF264	-0.346005	7.13547e-12	5.08961e-11	371	371
GPR182	-0.345969	7.17306e-12	5.11459e-11	371	318
NIPBL	-0.345949	7.19509e-12	5.12847e-11	371	371
LIFR	-0.345934	7.21025e-12	5.13743e-11	371	371
MAFB	-0.345862	7.28765e-12	5.19072e-11	371	371
ANKRD13C	-0.345666	7.5024e-12	5.33796e-11	371	371
HMGXB4	-0.345643	7.52734e-12	5.35379e-11	371	371
PHACTR2	-0.34548	7.71082e-12	5.48038e-11	371	371
TLL1	-0.345434	7.76342e-12	5.51579e-11	371	342
BTBD19	-0.345305	7.91251e-12	5.61571e-11	371	357
MLLT10	-0.345246	7.98098e-12	5.66229e-11	371	371
CTCF	-0.345091	8.1663e-12	5.78965e-11	371	371
PTPN21	-0.345047	8.21868e-12	5.82471e-11	371	371
LOC646471	-0.344971	8.31167e-12	5.88851e-11	371	367
ANKRD26	-0.34493	8.36202e-12	5.92208e-11	371	371
MICALCL	-0.344805	8.51665e-12	6.02516e-11	371	340
PGM2	-0.344799	8.52525e-12	6.02911e-11	371	371
THUMPD1	-0.344745	8.59271e-12	6.07251e-11	371	371
DIP2A	-0.344647	8.71694e-12	6.15705e-11	371	371
PLA2G12A	-0.344646	8.71852e-12	6.15705e-11	371	371
DCBLD2	-0.344636	8.73167e-12	6.16415e-11	371	371
JMY	-0.344236	9.25976e-12	6.53232e-11	371	371
PHLPP2	-0.343959	9.64514e-12	6.79697e-11	371	371
HDGFRP3	-0.343884	9.75127e-12	6.86448e-11	371	371
TBC1D2B	-0.343868	9.77385e-12	6.87763e-11	371	371
IMPACT	-0.343866	9.77685e-12	6.87763e-11	371	371
ATL2	-0.343781	9.90051e-12	6.96216e-11	371	371
PTPRE	-0.343683	1.0043e-11	7.0574e-11	371	371
RBAK	-0.343614	1.01457e-11	7.12703e-11	371	371
KLHL4	-0.343469	1.03629e-11	7.27707e-11	371	361
2022-03-01	-0.343458	1.03797e-11	7.28367e-11	371	367
YAP1	-0.343426	1.04288e-11	7.31304e-11	371	371
ZBTB37	-0.343366	1.05199e-11	7.37426e-11	371	370
XPO4	-0.343363	1.05252e-11	7.37544e-11	371	371
DNAJC3	-0.343333	1.05708e-11	7.40215e-11	371	371
PCDHB18	-0.343294	1.06321e-11	7.43989e-11	371	331
SH3RF1	-0.343087	1.09592e-11	7.65619e-11	371	371
C4orf32	-0.343038	1.10371e-11	7.70703e-11	371	371
HERC4	-0.342963	1.11603e-11	7.7876e-11	371	371
CRTC3	-0.342827	1.13828e-11	7.94008e-11	371	371
GTF2I	-0.342794	1.14385e-11	7.97331e-11	371	371
SEMA6D	-0.342754	1.15064e-11	8.01654e-11	371	371
LARP7	-0.342668	1.16505e-11	8.10979e-11	371	371
TMEM33	-0.342145	1.25752e-11	8.74425e-11	371	371
ABCD2	-0.341888	1.30545e-11	9.06807e-11	371	342
NEO1	-0.341841	1.31446e-11	9.12746e-11	371	371
PDE2A	-0.341693	1.34312e-11	9.32e-11	371	371
PTPN9	-0.341635	1.35444e-11	9.39196e-11	371	371
FLI1	-0.341467	1.388e-11	9.61797e-11	371	371
PREX1	-0.3414	1.4015e-11	9.70143e-11	371	371
STAM2	-0.341265	1.4294e-11	9.88424e-11	371	371
DCAF10	-0.341053	1.47401e-11	1.01892e-10	371	371
HIATL1	-0.340957	1.49485e-11	1.03297e-10	371	371
PCDHGB3	-0.340788	1.53187e-11	1.05708e-10	371	310
FAM83G	-0.340674	1.55748e-11	1.07438e-10	371	370
MYOCD	-0.340655	1.56167e-11	1.0769e-10	371	324
SLC4A4	-0.3406	1.5743e-11	1.08451e-10	371	371
PKP2	-0.340599	1.57435e-11	1.08451e-10	371	370
ESR1	-0.340481	1.60172e-11	1.10299e-10	371	369
KCTD18	-0.340428	1.61399e-11	1.11067e-10	371	371
TRAK1	-0.340352	1.63176e-11	1.12251e-10	371	371
RNF11	-0.34007	1.69995e-11	1.16781e-10	371	371
PCDHGA9	-0.340066	1.70075e-11	1.16795e-10	371	340
TAL1	-0.339918	1.73751e-11	1.19156e-10	371	371
USP24	-0.33982	1.76253e-11	1.20788e-10	371	371
ZFYVE9	-0.339729	1.78576e-11	1.22296e-10	371	371
ERLIN2	-0.339617	1.81501e-11	1.24129e-10	371	371
SVEP1	-0.339568	1.82783e-11	1.24963e-10	371	364
UBE2H	-0.339541	1.83492e-11	1.25361e-10	371	371
SH3BGRL	-0.339356	1.88471e-11	1.28675e-10	371	371
SNX29	-0.339206	1.92588e-11	1.3144e-10	371	371
APP	-0.339126	1.9482e-11	1.32873e-10	371	371
C4orf12	-0.339072	1.96336e-11	1.33861e-10	371	337
ZNF24	-0.338874	2.02042e-11	1.37657e-10	371	371
MYO18A	-0.338644	2.0884e-11	1.42094e-10	371	371
PUS7L	-0.338563	2.11297e-11	1.43668e-10	371	371
MASP1	-0.338546	2.11792e-11	1.43955e-10	371	371
SETD5	-0.338471	2.14101e-11	1.45475e-10	371	371
ZNF551	-0.33844	2.1507e-11	1.46084e-10	371	369
PURA	-0.338412	2.15928e-11	1.46566e-10	371	371
MAP3K5	-0.338374	2.17105e-11	1.47315e-10	371	371
ATP7A	-0.338283	2.19971e-11	1.49158e-10	371	371
LIN7C	-0.338274	2.20237e-11	1.49287e-10	371	371
ITM2A	-0.33816	2.23896e-11	1.51716e-10	371	371
TMED2	-0.338079	2.26508e-11	1.53382e-10	371	371
DCAF5	-0.338043	2.27694e-11	1.54132e-10	371	371
GLYR1	-0.337985	2.2958e-11	1.55304e-10	371	371
RCBTB2	-0.337919	2.31776e-11	1.56704e-10	371	371
ECM2	-0.337827	2.34861e-11	1.58661e-10	371	371
GPRASP1	-0.337762	2.37076e-11	1.60103e-10	371	370
BAZ1A	-0.337678	2.39949e-11	1.61988e-10	371	371
TRMT11	-0.337526	2.4522e-11	1.65434e-10	371	371
NUP54	-0.337522	2.45366e-11	1.65477e-10	371	371
ST8SIA6	-0.337515	2.45629e-11	1.65564e-10	371	158
SNX19	-0.337426	2.4875e-11	1.67589e-10	371	371
RGPD5	-0.337388	2.50139e-11	1.68467e-10	371	351
SUV420H1	-0.337341	2.51817e-11	1.6954e-10	371	371
PCSK6	-0.337198	2.5704e-11	1.72999e-10	371	371
TMEM26	-0.337188	2.57392e-11	1.73148e-10	371	367
LARS2	-0.337187	2.57436e-11	1.73148e-10	371	371
GBE1	-0.337105	2.60466e-11	1.75068e-10	371	371
SMC5	-0.337069	2.61821e-11	1.75919e-10	371	371
SNORD116-4	-0.337066	2.61932e-11	1.75934e-10	371	254
UBQLN1	-0.337033	2.63158e-11	1.76638e-10	371	371
DHTKD1	-0.336945	2.66521e-11	1.78835e-10	371	371
VPS13B	-0.336867	2.69509e-11	1.80722e-10	371	371
XYLT1	-0.336815	2.71499e-11	1.8193e-10	371	371
PCDHGB2	-0.336779	2.72928e-11	1.82827e-10	371	354
ZNF430	-0.336732	2.74752e-11	1.83801e-10	371	359
SNX30	-0.33633	2.90977e-11	1.9446e-10	371	371
PANK3	-0.336297	2.9239e-11	1.95339e-10	371	371
FAM18B	-0.336217	2.95729e-11	1.9739e-10	371	371
RNF41	-0.336216	2.95758e-11	1.9739e-10	371	371
EIF2C3	-0.336183	2.97159e-11	1.98258e-10	371	371
AGTPBP1	-0.336147	2.98709e-11	1.99226e-10	371	371
G2E3	-0.336009	3.04647e-11	2.03119e-10	371	371
PGAP1	-0.335904	3.09223e-11	2.06032e-10	371	371
BRD3	-0.335895	3.09628e-11	2.06233e-10	371	371
CRKL	-0.335863	3.11049e-11	2.0711e-10	371	371
DCAF17	-0.335762	3.15545e-11	2.09893e-10	371	371
C14orf4	-0.335729	3.17026e-11	2.10807e-10	371	371
R3HDM2	-0.335582	3.23766e-11	2.15218e-10	371	371
XCR1	-0.335537	3.25839e-11	2.16451e-10	371	177
TBC1D12	-0.335375	3.3345e-11	2.21359e-10	371	371
C10orf12	-0.335334	3.35361e-11	2.22553e-10	371	371
HOOK3	-0.33522	3.40861e-11	2.25728e-10	371	371
NARG2	-0.335187	3.42446e-11	2.26651e-10	371	371
ZNF627	-0.335012	3.51112e-11	2.32156e-10	371	371
CASC5	-0.334895	3.56962e-11	2.35789e-10	371	371
NID1	-0.334698	3.67077e-11	2.42069e-10	371	371
BAT2L1	-0.334668	3.68679e-11	2.43045e-10	371	371
STS	-0.334367	3.84727e-11	2.53373e-10	371	371
MBD5	-0.334241	3.91657e-11	2.57681e-10	371	371
MXRA5	-0.334237	3.91901e-11	2.57756e-10	371	371
NAV2	-0.33423	3.92315e-11	2.57944e-10	371	371
DCHS1	-0.334216	3.93065e-11	2.58352e-10	371	371
THAP9	-0.334044	4.02794e-11	2.64659e-10	371	371
KRR1	-0.333922	4.09765e-11	2.69062e-10	371	371
AFAP1L2	-0.333822	4.15603e-11	2.72626e-10	371	371
RNF180	-0.333811	4.16288e-11	2.72985e-10	371	370
ZNF704	-0.333385	4.42142e-11	2.89653e-10	371	368
CRLF3	-0.333167	4.55933e-11	2.9859e-10	371	371
FGFR1OP2	-0.333149	4.57076e-11	2.9924e-10	371	371
TMEM47	-0.333132	4.58183e-11	2.99768e-10	371	371
MAPKSP1	-0.333129	4.58412e-11	2.99819e-10	371	371
C14orf106	-0.333109	4.59681e-11	3.0055e-10	371	371
TLN1	-0.332915	4.7246e-11	3.08804e-10	371	371
CD300E	-0.332856	4.76389e-11	3.11168e-10	371	167
TSHZ2	-0.332754	4.83287e-11	3.1557e-10	371	369
FBXO21	-0.332605	4.93506e-11	3.22032e-10	371	371
GFPT1	-0.332588	4.94692e-11	3.227e-10	371	371
TBK1	-0.332586	4.9487e-11	3.22711e-10	371	371
ARHGAP32	-0.332559	4.96759e-11	3.23836e-10	371	371
VHL	-0.332387	5.08918e-11	3.31437e-10	371	371
ARRDC4	-0.332261	5.18033e-11	3.37263e-10	371	371
SEMA5A	-0.332182	5.23822e-11	3.4092e-10	371	371
TACC1	-0.332164	5.25165e-11	3.41683e-10	371	371
SUGT1L1	-0.332081	5.31302e-11	3.45563e-10	371	371
VCPIP1	-0.332051	5.33542e-11	3.46907e-10	371	371
C8orf4	-0.331893	5.45542e-11	3.54247e-10	371	371
FAR2	-0.331888	5.45886e-11	3.54355e-10	371	369
TXNDC16	-0.331769	5.55098e-11	3.601e-10	371	371
LY75	-0.331624	5.66504e-11	3.6714e-10	371	371
ASH1L	-0.331585	5.69672e-11	3.69073e-10	371	371
ASAH1	-0.331576	5.70358e-11	3.69398e-10	371	371
IL6R	-0.33148	5.78106e-11	3.74172e-10	371	371
CMPK1	-0.33137	5.87058e-11	3.79843e-10	371	371
VPS36	-0.331294	5.93351e-11	3.8379e-10	371	371
AMMECR1L	-0.331122	6.07824e-11	3.92896e-10	371	371
XPO7	-0.330913	6.2591e-11	4.04325e-10	371	371
SKI	-0.330875	6.29301e-11	4.06384e-10	371	371
EIF3A	-0.330832	6.33097e-11	4.0857e-10	371	371
NAV1	-0.330758	6.39646e-11	4.12663e-10	371	371
PCDHB15	-0.330719	6.43116e-11	4.14767e-10	371	365
2022-09-07	-0.330665	6.4807e-11	4.17827e-10	371	371
SNX18	-0.330441	6.68608e-11	4.30789e-10	371	371
ZNF33A	-0.330438	6.68959e-11	4.30876e-10	371	371
MTMR10	-0.33041	6.71507e-11	4.32378e-10	371	371
C4orf34	-0.330391	6.7332e-11	4.33405e-10	371	371
TSSK1B	-0.330322	6.79872e-11	4.37481e-10	371	191
LOC145820	-0.33029	6.82879e-11	4.39274e-10	371	368
C10orf18	-0.330256	6.86174e-11	4.41109e-10	371	371
SDPR	-0.330237	6.8802e-11	4.42152e-10	371	371
FAM26E	-0.330162	6.95239e-11	4.46504e-10	371	371
GNA14	-0.330107	7.00595e-11	4.49654e-10	371	369
SPRED1	-0.330093	7.01908e-11	4.50352e-10	371	371
PAK2	-0.32981	7.30227e-11	4.67768e-10	371	371
DYNC1LI2	-0.329804	7.30855e-11	4.6802e-10	371	371
ATP2C1	-0.32979	7.32276e-11	4.68669e-10	371	371
PDE1C	-0.329392	7.74045e-11	4.94565e-10	371	297
TSPYL4	-0.329371	7.76246e-11	4.95653e-10	371	371
ACVR1	-0.329324	7.81395e-11	4.98781e-10	371	371
PXDN	-0.329293	7.84755e-11	5.00605e-10	371	371
TMEM233	-0.329279	7.86255e-11	5.01401e-10	371	360
AHCYL2	-0.329235	7.91154e-11	5.04364e-10	371	371
KAL1	-0.329199	7.95107e-11	5.0656e-10	371	367
KRBA2	-0.329166	7.98792e-11	5.08745e-10	371	369
HELB	-0.329042	8.12624e-11	5.17224e-10	371	368
NAP1L5	-0.32903	8.13995e-11	5.17931e-10	371	371
KIF26A	-0.329018	8.15408e-11	5.18664e-10	371	370
FLG	-0.328942	8.24049e-11	5.23993e-10	371	270
GPR157	-0.328935	8.24832e-11	5.24324e-10	371	362
ELTD1	-0.328894	8.29552e-11	5.26988e-10	371	371
MBTPS2	-0.328883	8.30768e-11	5.27592e-10	371	371
UBE3B	-0.328775	8.43353e-11	5.35243e-10	371	371
POLI	-0.328749	8.46423e-11	5.3702e-10	371	371
CNTLN	-0.328324	8.97896e-11	5.69134e-10	371	371
SPATA1	-0.328319	8.98543e-11	5.69363e-10	371	337
PCDHB11	-0.328278	9.03615e-11	5.72395e-10	371	343
FBXL5	-0.328003	9.38677e-11	5.94038e-10	371	371
ADNP	-0.327926	9.48717e-11	6.00011e-10	371	371
ZRANB3	-0.327853	9.58352e-11	6.05912e-10	371	370
VPS37A	-0.327818	9.6309e-11	6.08401e-10	371	371
DSCR3	-0.327817	9.63205e-11	6.08401e-10	371	371
MPP5	-0.327404	1.01977e-10	6.4352e-10	371	371
NAF1	-0.327254	1.04126e-10	6.56661e-10	371	371
SIK2	-0.327192	1.05016e-10	6.61858e-10	371	371
COPS2	-0.327167	1.05373e-10	6.63684e-10	371	371
PRDM1	-0.327087	1.06549e-10	6.70246e-10	371	371
RAB27A	-0.326975	1.08214e-10	6.80078e-10	371	371
ARL6IP1	-0.32688	1.0963e-10	6.88543e-10	371	371
RTF1	-0.326872	1.09756e-10	6.89113e-10	371	371
ARL5A	-0.326656	1.13083e-10	7.09782e-10	371	371
NNAT	-0.326652	1.13142e-10	7.09864e-10	371	306
CUL4A	-0.32665	1.13168e-10	7.09864e-10	371	371
IFT80	-0.326365	1.177e-10	7.37595e-10	371	371
KIF21A	-0.326342	1.18077e-10	7.39723e-10	371	371
DUSP16	-0.326279	1.1911e-10	7.45961e-10	371	371
RGP1	-0.326242	1.19709e-10	7.49479e-10	371	371
ATP8B1	-0.326096	1.2215e-10	7.64522e-10	371	371
MAPRE2	-0.326032	1.23215e-10	7.70703e-10	371	371
BACH2	-0.326	1.23758e-10	7.73857e-10	371	370
COL15A1	-0.325958	1.24492e-10	7.78201e-10	371	371
LRRC58	-0.325912	1.25269e-10	7.82814e-10	371	371
GJA1	-0.325756	1.27981e-10	7.98506e-10	371	371
TAF2	-0.32572	1.28618e-10	8.0188e-10	371	371
NEDD4	-0.325712	1.28762e-10	8.02373e-10	371	371
TBC1D15	-0.325677	1.29379e-10	8.0597e-10	371	371
ZNF17	-0.325661	1.29673e-10	8.07548e-10	371	371
FRK	-0.325649	1.29877e-10	8.08564e-10	371	371
CALCOCO1	-0.325347	1.35385e-10	8.42065e-10	371	371
KDM4C	-0.325272	1.3679e-10	8.50539e-10	371	371
FAM149A	-0.325254	1.37117e-10	8.52304e-10	371	371
ZDHHC15	-0.325224	1.37687e-10	8.55584e-10	371	334
MBIP	-0.325142	1.39244e-10	8.64992e-10	371	371
ZNF254	-0.325105	1.39949e-10	8.69095e-10	371	371
FHL1	-0.324986	1.42245e-10	8.83082e-10	371	371
NBPF1	-0.324965	1.42652e-10	8.85053e-10	371	371
DCP1A	-0.324852	1.44879e-10	8.97752e-10	371	371
NAV3	-0.32477	1.46519e-10	9.07353e-10	371	367
RNF141	-0.324644	1.49079e-10	9.22348e-10	371	371
GANC	-0.324629	1.49373e-10	9.23877e-10	371	371
DYNC2H1	-0.324561	1.50782e-10	9.32014e-10	371	368
WISP1	-0.324543	1.51139e-10	9.33642e-10	371	363
STXBP5	-0.324541	1.51195e-10	9.33699e-10	371	371
FOXJ3	-0.32449	1.52236e-10	9.39833e-10	371	371
TAGAP	-0.324386	1.54432e-10	9.52798e-10	371	371
GNB4	-0.324368	1.54796e-10	9.54454e-10	371	371
SEC63	-0.324242	1.57494e-10	9.70492e-10	371	371
DYNC1I2	-0.324201	1.58375e-10	9.75488e-10	371	371
CREB1	-0.324185	1.5873e-10	9.77203e-10	371	371
PTPRM	-0.324157	1.59335e-10	9.80621e-10	371	371
NIPSNAP3A	-0.324042	1.61858e-10	9.95534e-10	371	371
KIAA0562	-0.324003	1.62731e-10	1.00059e-09	371	371
EDEM3	-0.323997	1.62855e-10	1.00105e-09	371	371
GPBP1L1	-0.323975	1.63339e-10	1.00371e-09	371	371
ETNK1	-0.323929	1.64364e-10	1.0097e-09	371	371
THBS1	-0.323801	1.67264e-10	1.02625e-09	371	371
DKFZp686O24166	-0.323798	1.67337e-10	1.02638e-09	371	351
TTC33	-0.323773	1.67908e-10	1.02957e-09	371	371
FBXO38	-0.323636	1.71086e-10	1.04841e-09	371	371
ZNF440	-0.323607	1.71742e-10	1.05211e-09	371	371
SESN1	-0.323581	1.72357e-10	1.05523e-09	371	371
HEATR3	-0.323578	1.72441e-10	1.05537e-09	371	371
SCN7A	-0.323567	1.7269e-10	1.05596e-09	371	243
PPM1D	-0.323554	1.72993e-10	1.05749e-09	371	371
CHSY3	-0.323522	1.73749e-10	1.06179e-09	371	371
C14orf167	-0.323506	1.74142e-10	1.06386e-09	371	371
RCSD1	-0.323454	1.75382e-10	1.07078e-09	371	371
KPNA3	-0.323414	1.76327e-10	1.07589e-09	371	371
C18orf25	-0.323391	1.76894e-10	1.07902e-09	371	371
FBLN5	-0.323325	1.78474e-10	1.08833e-09	371	371
TMX1	-0.323214	1.81192e-10	1.10423e-09	371	371
PDE4B	-0.32314	1.83022e-10	1.11469e-09	371	371
MSL2	-0.323112	1.83738e-10	1.11871e-09	371	371
GATM	-0.323077	1.84599e-10	1.12361e-09	371	371
PIGK	-0.322968	1.87364e-10	1.1401e-09	371	371
ABCE1	-0.322887	1.89446e-10	1.15171e-09	371	371
BTN2A3	-0.322846	1.90499e-10	1.15775e-09	371	368
COL12A1	-0.322788	1.92019e-10	1.16664e-09	371	370
SCRN3	-0.322737	1.93356e-10	1.17405e-09	371	371
AASDHPPT	-0.322628	1.96241e-10	1.19083e-09	371	371
LMBRD1	-0.322592	1.972e-10	1.19593e-09	371	371
SLC22A25	-0.322358	2.03547e-10	1.23217e-09	371	366
FAM120A	-0.322297	2.05252e-10	1.24211e-09	371	371
SCN4B	-0.322268	2.06065e-10	1.24628e-09	371	370
ANUBL1	-0.322253	2.06489e-10	1.24808e-09	371	371
SLC38A2	-0.322216	2.07502e-10	1.25344e-09	371	371
RLIM	-0.322145	2.09527e-10	1.26491e-09	371	371
APAF1	-0.322136	2.09772e-10	1.266e-09	371	371
ITGAV	-0.32197	2.14539e-10	1.29399e-09	371	371
BNIP3L	-0.321911	2.16281e-10	1.3041e-09	371	371
WIPF2	-0.321881	2.17141e-10	1.30889e-09	371	371
FAM82A1	-0.321838	2.18437e-10	1.31631e-09	371	371
SMC1A	-0.321822	2.18897e-10	1.31867e-09	371	371
ANKIB1	-0.321783	2.20051e-10	1.32523e-09	371	371
PGR	-0.321767	2.20527e-10	1.32769e-09	371	335
USP28	-0.321323	2.34175e-10	1.40773e-09	371	371
ZNF354B	-0.321208	2.3785e-10	1.42853e-09	371	371
MFN1	-0.321084	2.41877e-10	1.45228e-09	371	371
SLC6A1	-0.32102	2.43963e-10	1.46332e-09	371	371
MMAA	-0.321019	2.44009e-10	1.46332e-09	371	371
IKZF2	-0.320908	2.47699e-10	1.48431e-09	371	371
NOTCH3	-0.320907	2.47733e-10	1.48431e-09	371	371
CCRN4L	-0.320682	2.55363e-10	1.52957e-09	371	371
TIRAP	-0.32067	2.5577e-10	1.53155e-09	371	371
LOC728024	-0.320657	2.56205e-10	1.53333e-09	371	364
RBMS2	-0.320657	2.56222e-10	1.53333e-09	371	371
PPFIA1	-0.320589	2.58591e-10	1.54565e-09	371	371
TIPARP	-0.320429	2.64225e-10	1.57885e-09	371	371
NCAM2	-0.320282	2.6949e-10	1.60886e-09	371	282
DENND1B	-0.320238	2.71109e-10	1.61756e-09	371	371
CLDND1	-0.320218	2.71833e-10	1.62139e-09	371	371
GRAMD1C	-0.320209	2.7218e-10	1.62298e-09	371	371
KIAA1468	-0.320161	2.73918e-10	1.63237e-09	371	371
PRRC1	-0.320003	2.79831e-10	1.6666e-09	371	371
ZSCAN29	-0.319916	2.83103e-10	1.68559e-09	371	371
ADAMTSL1	-0.31989	2.84115e-10	1.69111e-09	371	370
RGPD1	-0.319799	2.8761e-10	1.71089e-09	371	371
PABPC5	-0.319757	2.89228e-10	1.71949e-09	371	330
C17orf85	-0.319655	2.93211e-10	1.7416e-09	371	371
RAB11FIP2	-0.319627	2.94311e-10	1.7471e-09	371	371
LTBP1	-0.319446	3.01553e-10	1.78902e-09	371	371
SCAMP1	-0.319394	3.03689e-10	1.80055e-09	371	371
LOC144438	-0.319334	3.06149e-10	1.81413e-09	371	371
DPF3	-0.319323	3.06606e-10	1.8163e-09	371	367
CTNNB1	-0.319267	3.08884e-10	1.8287e-09	371	371
C1RL	-0.319159	3.13405e-10	1.85492e-09	371	371
CX3CR1	-0.31902	3.19301e-10	1.88869e-09	371	370
PCDHB4	-0.319005	3.19929e-10	1.89184e-09	371	361
LILRA1	-0.318984	3.20858e-10	1.89677e-09	371	320
CXorf38	-0.318961	3.21847e-10	1.90206e-09	371	371
GUCY1B3	-0.318946	3.22505e-10	1.90538e-09	371	371
PDXDC1	-0.318871	3.25743e-10	1.92394e-09	371	371
NFASC	-0.31882	3.27965e-10	1.93649e-09	371	371
KRAS	-0.31857	3.39149e-10	1.99897e-09	371	371
TXNIP	-0.318488	3.42894e-10	2.01985e-09	371	371
DDX60	-0.318468	3.43802e-10	2.0246e-09	371	371
NCR1	-0.318456	3.44338e-10	2.02716e-09	371	201
FBXW11	-0.318387	3.47544e-10	2.04543e-09	371	371
CELF2	-0.31837	3.48316e-10	2.04937e-09	371	371
ARHGAP24	-0.318326	3.50376e-10	2.06088e-09	371	371
SRP54	-0.318318	3.50748e-10	2.06245e-09	371	371
MLXIP	-0.318301	3.5156e-10	2.06662e-09	371	371
EIF4E	-0.318234	3.54744e-10	2.08411e-09	371	371
PDHX	-0.31823	3.5491e-10	2.08447e-09	371	371
PROS1	-0.318103	3.60992e-10	2.11894e-09	371	371
TRAK2	-0.318084	3.6192e-10	2.12376e-09	371	371
HEMGN	-0.317885	3.71664e-10	2.17799e-09	371	146
CMIP	-0.317732	3.7934e-10	2.22206e-09	371	371
SLC2A14	-0.317709	3.80474e-10	2.22804e-09	371	353
KALRN	-0.317618	3.85138e-10	2.25469e-09	371	371
BMI1	-0.317519	3.9025e-10	2.28395e-09	371	371
PPP2CB	-0.317513	3.90568e-10	2.28447e-09	371	371
ALDH8A1	-0.317458	3.93444e-10	2.30061e-09	371	371
TRIP12	-0.317454	3.93635e-10	2.30106e-09	371	371
CACNA1C	-0.317435	3.94664e-10	2.30639e-09	371	371
ARHGAP6	-0.317243	4.04886e-10	2.36405e-09	371	370
NEK4	-0.317216	4.06304e-10	2.37163e-09	371	371
TUBGCP3	-0.31713	4.11009e-10	2.39839e-09	371	371
PCDHGB6	-0.317062	4.14755e-10	2.41884e-09	371	356
TNPO1	-0.316944	4.2129e-10	2.4548e-09	371	371
EOMES	-0.316937	4.21682e-10	2.45636e-09	371	360
ZNF75D	-0.316925	4.22366e-10	2.45962e-09	371	371
2022-03-06	-0.316841	4.27092e-10	2.48642e-09	371	371
ZNF717	-0.316806	4.2912e-10	2.49749e-09	371	364
SHANK2	-0.316728	4.33574e-10	2.52195e-09	371	370
CGNL1	-0.316678	4.36449e-10	2.53792e-09	371	371
LOC645752	-0.316645	4.38398e-10	2.54852e-09	371	154
GPM6A	-0.31646	4.49262e-10	2.61015e-09	371	345
IL1RL1	-0.31645	4.49914e-10	2.61318e-09	371	324
KDM4A	-0.316372	4.54583e-10	2.63876e-09	371	371
SIN3A	-0.316365	4.54978e-10	2.64028e-09	371	371
EHMT1	-0.316279	4.60228e-10	2.66919e-09	371	371
WDTC1	-0.315997	4.77755e-10	2.76842e-09	371	371
SPG20	-0.315913	4.83128e-10	2.79874e-09	371	371
PLXNA4	-0.315895	4.84261e-10	2.80449e-09	371	326
ZMYM5	-0.315862	4.86363e-10	2.81503e-09	371	371
TTC39B	-0.315807	4.89936e-10	2.83406e-09	371	369
ZNF638	-0.3158	4.9039e-10	2.83587e-09	371	371
SLC30A5	-0.31579	4.91018e-10	2.83867e-09	371	371
2022-03-05	-0.31573	4.94947e-10	2.86056e-09	371	371
TMEM38B	-0.315725	4.9527e-10	2.86159e-09	371	371
KLF11	-0.315657	4.99784e-10	2.886e-09	371	371
DKK2	-0.315633	5.01332e-10	2.8941e-09	371	346
CDH1	-0.315607	5.03053e-10	2.90319e-09	371	371
CCDC144A	-0.315502	5.10135e-10	2.94236e-09	371	238
GABRR2	-0.315368	5.19242e-10	2.99315e-09	371	226
LOC729020	-0.315246	5.27662e-10	3.03905e-09	371	369
ADAMTS2	-0.315195	5.31245e-10	3.05704e-09	371	370
SCAPER	-0.315157	5.33915e-10	3.07152e-09	371	371
ZNF432	-0.315053	5.41315e-10	3.11229e-09	371	369
BVES	-0.315016	5.4396e-10	3.12659e-09	371	363
CEP120	-0.314959	5.48096e-10	3.14946e-09	371	371
ANTXR1	-0.314901	5.52261e-10	3.17247e-09	371	371
ADIPOR2	-0.314826	5.578e-10	3.20153e-09	371	371
SHE	-0.314796	5.60004e-10	3.21325e-09	371	371
PAH	-0.314754	5.6307e-10	3.22991e-09	371	371
MCTP1	-0.314692	5.67706e-10	3.25557e-09	371	370
NBPF16	-0.314659	5.70226e-10	3.26907e-09	371	341
EHHADH	-0.314641	5.71548e-10	3.27511e-09	371	371
MAGT1	-0.314617	5.73359e-10	3.28401e-09	371	371
SAMD9	-0.314615	5.7349e-10	3.28401e-09	371	371
ARAP2	-0.31457	5.76921e-10	3.30271e-09	371	371
STX11	-0.314425	5.88072e-10	3.36461e-09	371	371
DISC1	-0.314377	5.91833e-10	3.38516e-09	371	371
FARP2	-0.314076	6.15727e-10	3.51677e-09	371	371
ZNF710	-0.314038	6.18811e-10	3.53237e-09	371	370
MECOM	-0.313922	6.28325e-10	3.58359e-09	371	371
BZW1	-0.313682	6.48446e-10	3.69729e-09	371	371
TMEM188	-0.313491	6.64952e-10	3.78599e-09	371	371
EGR3	-0.313392	6.73623e-10	3.83426e-09	371	369
IMPG1	-0.313299	6.81961e-10	3.87951e-09	371	235
ABCC6P1	-0.313292	6.82544e-10	3.88171e-09	371	367
GNA13	-0.313202	6.90691e-10	3.92561e-09	371	371
STAM	-0.3132	6.90855e-10	3.92561e-09	371	371
ARID5B	-0.313195	6.91291e-10	3.92697e-09	371	371
ZNF275	-0.313169	6.93623e-10	3.9391e-09	371	371
SLCO2A1	-0.313087	7.01127e-10	3.97944e-09	371	371
EPM2A	-0.313032	7.06227e-10	4.00725e-09	371	371
WDR17	-0.312958	7.13077e-10	4.04497e-09	371	273
PDGFD	-0.312939	7.14859e-10	4.05277e-09	371	371
ZNF225	-0.312817	7.26417e-10	4.11595e-09	371	370
LPAR4	-0.312759	7.31912e-10	4.14591e-09	371	213
HRNR	-0.312673	7.40233e-10	4.19185e-09	371	290
DMGDH	-0.312616	7.45747e-10	4.22067e-09	371	371
C3orf63	-0.312563	7.50982e-10	4.24909e-09	371	371
TNNI3K	-0.312455	7.617e-10	4.3069e-09	371	288
PPP3CA	-0.312453	7.61847e-10	4.3069e-09	371	371
ZADH2	-0.312373	7.69889e-10	4.35113e-09	371	371
MAP1B	-0.312367	7.70461e-10	4.35313e-09	371	371
MYO10	-0.312361	7.71126e-10	4.35542e-09	371	371
TSPAN18	-0.312359	7.71304e-10	4.35542e-09	371	371
MYO5A	-0.312338	7.7344e-10	4.36624e-09	371	371
CYP1B1	-0.312316	7.75584e-10	4.37664e-09	371	371
PRPF38B	-0.312315	7.75721e-10	4.37664e-09	371	371
ZFP36	-0.31226	7.81303e-10	4.40689e-09	371	371
FAR1	-0.31224	7.83348e-10	4.41717e-09	371	371
ITK	-0.312236	7.83807e-10	4.41753e-09	371	371
PDGFRB	-0.312217	7.85704e-10	4.42669e-09	371	371
SDHD	-0.312	8.08342e-10	4.54909e-09	371	371
FAM38B	-0.311959	8.1268e-10	4.57221e-09	371	370
ASAH2B	-0.311928	8.15942e-10	4.58927e-09	371	318
MTRR	-0.311907	8.18202e-10	4.60068e-09	371	371
PSMD5	-0.311904	8.18535e-10	4.60126e-09	371	371
NUP153	-0.31189	8.19989e-10	4.60813e-09	371	371
ZNF445	-0.311849	8.24398e-10	4.63029e-09	371	371
SORL1	-0.311811	8.28525e-10	4.65216e-09	371	371
SIKE1	-0.311711	8.39414e-10	4.70932e-09	371	371
NOS3	-0.311592	8.52504e-10	4.78142e-09	371	371
SLFN5	-0.311521	8.60468e-10	4.82337e-09	371	371
ZBTB39	-0.311517	8.6086e-10	4.8242e-09	371	371
HECA	-0.311425	8.71328e-10	4.8815e-09	371	371
FAM13A	-0.311408	8.73274e-10	4.88827e-09	371	371
ATG4C	-0.311349	8.79991e-10	4.92034e-09	371	371
RASSF2	-0.310903	9.32546e-10	5.20252e-09	371	371
KLHDC1	-0.310874	9.36052e-10	5.22061e-09	371	368
TBC1D4	-0.310802	9.44835e-10	5.26665e-09	371	371
FRY	-0.310546	9.76815e-10	5.4373e-09	371	371
SMAD7	-0.310529	9.79051e-10	5.44823e-09	371	371
TUBE1	-0.310478	9.85461e-10	5.48237e-09	371	371
ARHGEF10	-0.310458	9.88115e-10	5.4956e-09	371	371
ATMIN	-0.310432	9.9136e-10	5.5121e-09	371	371
ZNF326	-0.310395	9.96182e-10	5.53737e-09	371	371
ACVR1B	-0.310378	9.98327e-10	5.5462e-09	371	371
TFAM	-0.310337	1.00372e-09	5.57458e-09	371	371
FGD5	-0.31029	1.00986e-09	5.60557e-09	371	371
ADAMTS4	-0.310255	1.01439e-09	5.62918e-09	371	371
YTHDF3	-0.310102	1.0348e-09	5.74081e-09	371	371
FNIP1	-0.310091	1.03625e-09	5.74566e-09	371	371
TIMP3	-0.309942	1.05647e-09	5.85453e-09	371	371
FAM65B	-0.309863	1.06739e-09	5.91174e-09	371	371
TOR1AIP1	-0.309793	1.07705e-09	5.96358e-09	371	371
PACSIN2	-0.309682	1.0926e-09	6.04798e-09	371	371
ZNF697	-0.309625	1.10071e-09	6.09123e-09	371	371
CPT1A	-0.309551	1.11127e-09	6.14793e-09	371	371
C3orf70	-0.309479	1.12178e-09	6.20435e-09	371	370
SLC4A7	-0.309438	1.1277e-09	6.22922e-09	371	371
PPP1R15B	-0.309437	1.12784e-09	6.22922e-09	371	371
NTN3	-0.30942	1.13033e-09	6.24126e-09	371	303
MAP9	-0.309351	1.1405e-09	6.29565e-09	371	365
SLFN12	-0.309294	1.14886e-09	6.33829e-09	371	371
HTR1B	-0.30924	1.1569e-09	6.38089e-09	371	188
TMEM2	-0.309209	1.16158e-09	6.4014e-09	371	371
NIN	-0.309124	1.17437e-09	6.47005e-09	371	371
SRL	-0.308848	1.21705e-09	6.69781e-09	371	369
FAM199X	-0.308753	1.23211e-09	6.77693e-09	371	371
GREB1L	-0.308711	1.23871e-09	6.8095e-09	371	365
DHX15	-0.308483	1.27572e-09	7.00716e-09	371	371
C1orf168	-0.308403	1.28898e-09	7.07804e-09	371	366
BTBD1	-0.308399	1.28962e-09	7.0796e-09	371	371
PLAT	-0.308348	1.29801e-09	7.12174e-09	371	371
KANK2	-0.308166	1.32892e-09	7.28529e-09	371	371
MTUS1	-0.308073	1.34484e-09	7.37056e-09	371	371
ZNF426	-0.308014	1.35505e-09	7.42243e-09	371	366
PTGER3	-0.307842	1.38545e-09	7.58033e-09	371	366
ETS2	-0.30784	1.38578e-09	7.58033e-09	371	371
GLI3	-0.307821	1.38924e-09	7.59508e-09	371	369
C6orf186	-0.307688	1.41306e-09	7.72103e-09	371	273
LRRC34	-0.307659	1.41829e-09	7.74752e-09	371	371
SLC25A24	-0.307655	1.41916e-09	7.75012e-09	371	371
RBM18	-0.307619	1.42574e-09	7.78396e-09	371	371
RND3	-0.307558	1.43687e-09	7.84253e-09	371	371
FBXL4	-0.307524	1.44317e-09	7.87479e-09	371	371
CDH13	-0.30736	1.47387e-09	8.0357e-09	371	371
LOC100129034	-0.307347	1.47634e-09	8.04694e-09	371	371
LPIN2	-0.307319	1.48168e-09	8.06945e-09	371	371
RIMKLB	-0.307283	1.48845e-09	8.10411e-09	371	371
ZC3H14	-0.30725	1.49476e-09	8.13624e-09	371	371
PLXNC1	-0.307102	1.52344e-09	8.28328e-09	371	361
INS-IGF2	-0.307019	1.53975e-09	8.36511e-09	371	275
[truncated: 17,924 more rows]
